# Supplementary material for: Plant-based diets and all-cause and cause-specific mortality among patients with cardiovascular disease: a population-based cohort study
Source: Royal Society of Chemistry journal article supplement (doi:10.1039/d4fo05107f), 2025-01-01
Supplement: d4fo05107f1.pdf [file d4fo05107f1.pdf]

## Supplementary Material

**Figure S1.** Flow Chart of Study Participants for Analysis.

**Figure S2.** Diet Component Definitions Used in the Plant-based Diet Indices.

**Figure S3.** Dose-Response Relationships between PDI and Cause-Specific Mortality.

**Figure S4.** Dose-Response Relationships between hPDI and All-Cause and Cause-Specific Mortality.

**Figure S5.** Associations of PDI with All-Cause and Cause-Specific Mortality Stratified by Potential Risk Factors.

**Figure S6.** Associations of hPDI with All-Cause and Cause-Specific Mortality Stratified by Potential Risk Factors.

**Table S1.** Codes Used in the UK Biobank to Identify Death and Relevant Diseases.

**Table S2.** The original names of covariates in UK Biobank.

**Table S3.** The percentages of participants with missing covariates.

**Table S4.** Basic Characteristics of Participants According to Tertiles of healthy Plant-Based Diet Index (hPDI) in the UK Biobank Cohort.

**Table S5.** Basic Characteristics of Participants According to Tertiles of unhealthy Plant-Based Diet Index (uPDI) in the UK Biobank Cohort.

**Table S6.** Basic Characteristics of CVD Patients Included and Excluded in the Study.

**Table S7.** Basic Characteristics of CVD Patients according to Death in the Study.

**Table S8.** Results of Mediation Analyses between Overall PDI and Blood Biomarkers for All-Cause Mortality.

**Table S9.** Results of Mediation Analyses between healthy Plant-Based Diet and Blood Biomarkers for All-Cause Mortality.

**Table S10.** Results of Mediation Analyses between Unhealthy Plant-Based Diet and Blood Biomarkers for All-Cause and Cause-Specific Mortality.

**Table S11.** Sensitivity Analyses for Multivariable Hazard Ratios (95% CIs) of Mortality According to PDI.

**Table S12.** Sensitivity Analyses for Multivariable Hazard Ratios (95% CIs) of Mortality According to hPDI.

**Table S13.** Sensitivity Analyses for Multivariable Hazard Ratios (95% CIs) of Mortality According to uPDI.

**Table S14.** Sensitivity Analyses for Hazard Ratios (95% CIs) of All-Cause Mortality and Cause-Specific Mortality According to Tertiles of PDI, hPDI, or uPDI based on food intake in “g/d” rather than “serving/d” among Patients with CVD.

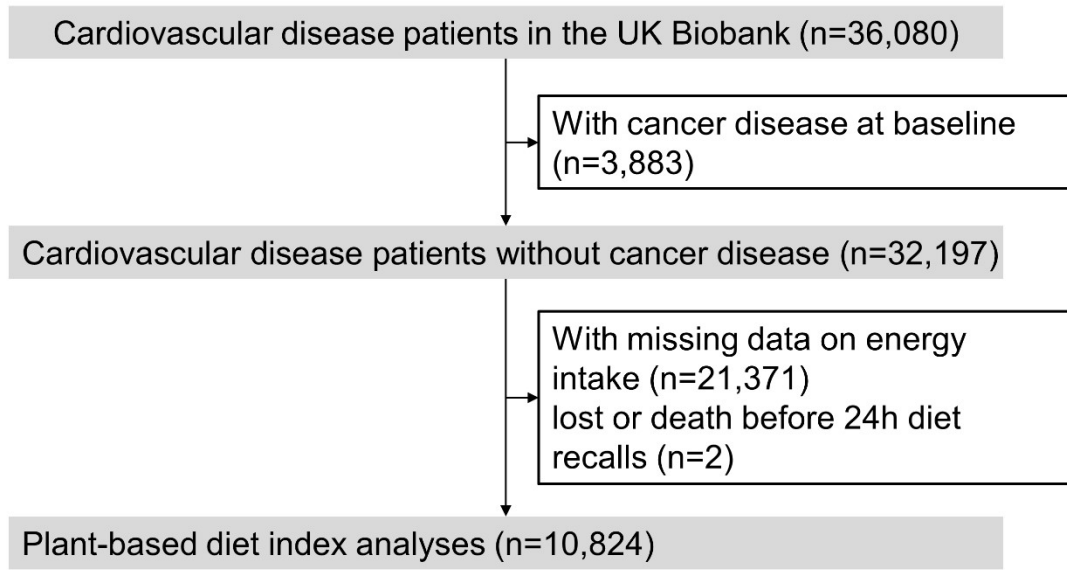

**Figure S1.** Flow Chart of Study Participants for Analysis.

| Plant Food Groups                       | Items                                                                                                                                                                                                                                                                                                                                                                     | Standard  | Score | PDI | hPDI | uPDI |
|-----------------------------------------|---------------------------------------------------------------------------------------------------------------------------------------------------------------------------------------------------------------------------------------------------------------------------------------------------------------------------------------------------------------------------|-----------|-------|-----|------|------|
| <b>Whole grains</b>                     | Porridge, muesli, oat crunch, bran cereal, non-white bread (flour types, brown, wholemeal, other type), whole-wheat cereal, whole meal pasta, brown rice, couscous, other cooked grains (such as bulgur)                                                                                                                                                                  | quintiles | 5     | ↑   | ↑    | ↓    |
| <b>Fruits</b>                           | Mixed fruit, apple, banana, berries, cherries, grapefruit, grapes, mango, melon, orange, orange-like small fruits, peach/nectarine, pear, pineapple, plum, other fruits, stewed/cooked fruit, prunes, other dried fruit                                                                                                                                                   | quintiles | 5     | ↑   | ↑    | ↓    |
| <b>Vegetables</b>                       | Mixed vegetables, vegetable pieces, coleslaw, side salad, beetroot, broccoli, butternut squash, cabbage/kale, carrots, cauliflower, celery, courgette, cucumber, garlic, leeks, lettuce, mushrooms, onion, parsnip, sweet peppers, spinach, sprouts, sweetcorn, sweet potato, fresh tomatoes, cooked or tinned tomatoes, turnip/swede, watercress, other vegetable intake | quintiles | 5     | ↑   | ↑    | ↓    |
| <b>Nuts</b>                             | Salted peanuts, unsalted peanuts, salted nuts, unsalted nuts, seeds                                                                                                                                                                                                                                                                                                       | quintiles | 5     | ↑   | ↑    | ↓    |
| <b>Legumes</b>                          | Beans (baked beans), other beans or lentils, broad beans, green beans, peas, tofu                                                                                                                                                                                                                                                                                         | quintiles | 5     | ↑   | ↑    | ↓    |
| <b>Vegetable oils</b>                   | Olive spread on bread/crackers (very low fat, low fat, normal fat, cholesterol-lowering, unknown)                                                                                                                                                                                                                                                                         | quintiles | 5     | ↑   | ↑    | ↓    |
| <b>Tea and coffee</b>                   | Instant coffee, filtered coffee, cappuccino, latte, espresso, other coffee drinks, standard tea, rooibos tea, green tea, herbal tea, other tea                                                                                                                                                                                                                            | quintiles | 5     | ↑   | ↑    | ↓    |
| <b>Fruit juices</b>                     | Orange juice, grapefruit juice                                                                                                                                                                                                                                                                                                                                            | quintiles | 5     | ↑   | ↓    | ↑    |
| <b>Refined grains</b>                   | Sweetened cereal, white bread, naan bread, garlic bread, white pasta, white rice                                                                                                                                                                                                                                                                                          | quintiles | 5     | ↑   | ↓    | ↑    |
| <b>Potatoes</b>                         | Fried potatoes, boiled/baked potatoes, mashed potatoes, crisps                                                                                                                                                                                                                                                                                                            | quintiles | 5     | ↑   | ↓    | ↑    |
| <b>Sugar sweetened beverages</b>        | Carbonated (fizzy) drinks, squash or cordial                                                                                                                                                                                                                                                                                                                              | quintiles | 5     | ↑   | ↓    | ↑    |
| <b>Sweets and desserts</b>              | Double crust pie, single crust pie/flan, Yorkshire pudding, Danish pastry, fruitcake, cake, doughnuts, sponge pudding, other dessert, chocolate bar, white chocolate, milk chocolate, dark chocolate, chocolate sweet, diet sweets, chocolate-covered biscuits, chocolate biscuits, sweet biscuits, other sweets                                                          | quintiles | 5     | ↑   | ↓    | ↑    |
| <b>Animal fat</b>                       | Butter on bread/crackers (spreadable, low fat, normal fat, or unknown type)                                                                                                                                                                                                                                                                                               | quintiles | 5     | ↓   | ↓    | ↓    |
| <b>Dairy</b>                            | Milk, yogurt, ice-cream, low fat hard cheese, hard cheese, soft cheese, blue cheese, low fat cheese spread, cheese spread, cottage cheese, feta cheese, mozzarella cheese, goat's cheese, other cheese                                                                                                                                                                    | quintiles | 5     | ↓   | ↓    | ↓    |
| <b>Egg</b>                              | Whole eggs, omelettes or scrambled egg, eggs in sandwiches, scotch egg, other egg dishes                                                                                                                                                                                                                                                                                  | quintiles | 5     | ↓   | ↓    | ↓    |
| <b>Fish or Seafood</b>                  | Tinned tuna, oily fish, breaded fish, battered fish, white fish, prawns, lobster/crab, shellfish, other fish intake                                                                                                                                                                                                                                                       | quintiles | 5     | ↓   | ↓    | ↓    |
| <b>Meat</b>                             | Sausage, beef, pork, lamb, crumbed or deep-fried poultry, poultry, bacon, ham, liver, other meat intake                                                                                                                                                                                                                                                                   | quintiles | 5     | ↓   | ↓    | ↓    |
| <b>Miscellaneous animal-based foods</b> | Pizza                                                                                                                                                                                                                                                                                                                                                                     | quintiles | 5     | ↓   | ↓    | ↓    |

**Figure S2.** Diet Component Definitions Used in the Plant-based Diet Indices.

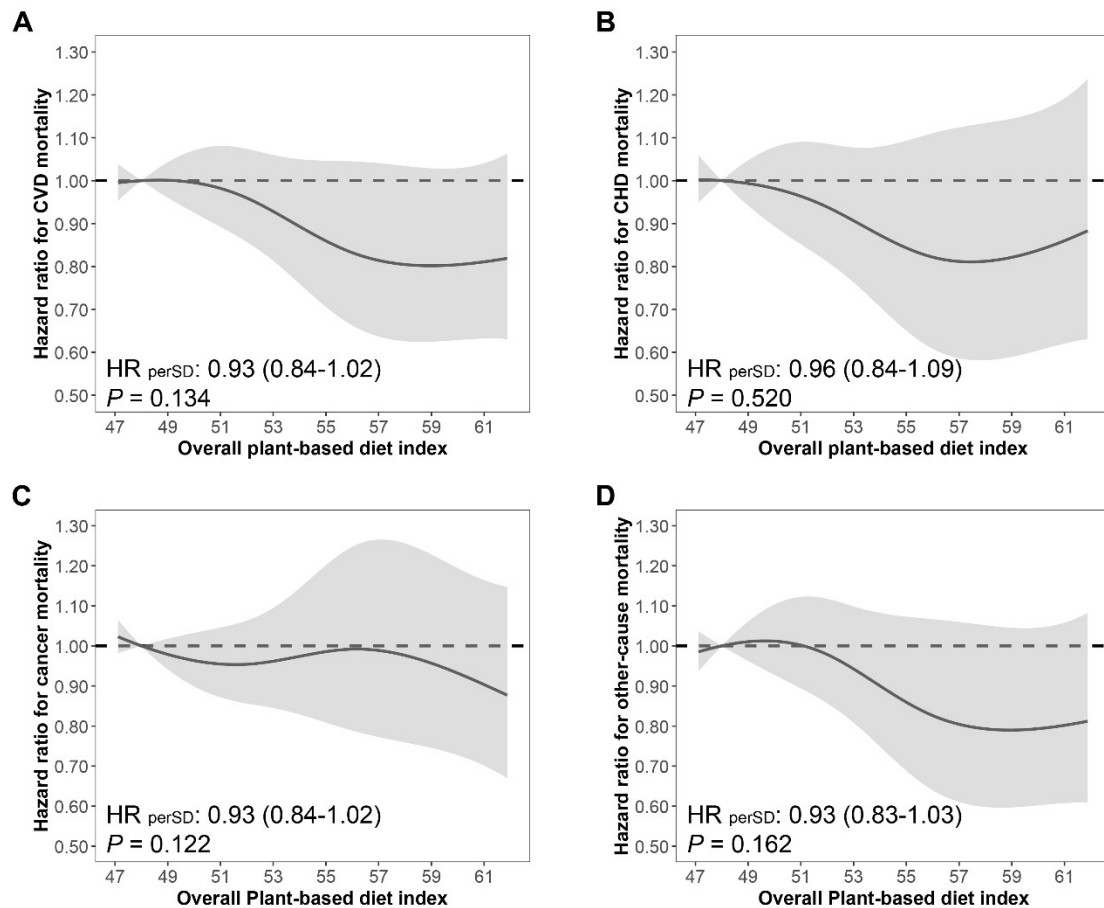

**Figure S3.** Dose-Response Relationships between PDI and Cause-Specific Mortality. Hazard ratios of CVD mortality (A), CHD mortality (B), cancer mortality (C), and other-cause mortality (D) according to PDI were estimated by restricted cubic spline regressions. The multivariable model was adjusted for age, sex, race, centers, BMI, household income, Townsend deprivation index, total energy intake, smoking status, alcohol consumption, physical activity, history of hypertension, history of hypercholesterolemia, history of diabetes, family history of cardiovascular disease, vitamin supplement use, mineral supplement use, aspirin use, lipid-lowering drug use, and CVD duration. Shaded areas represent 95% confidence intervals.

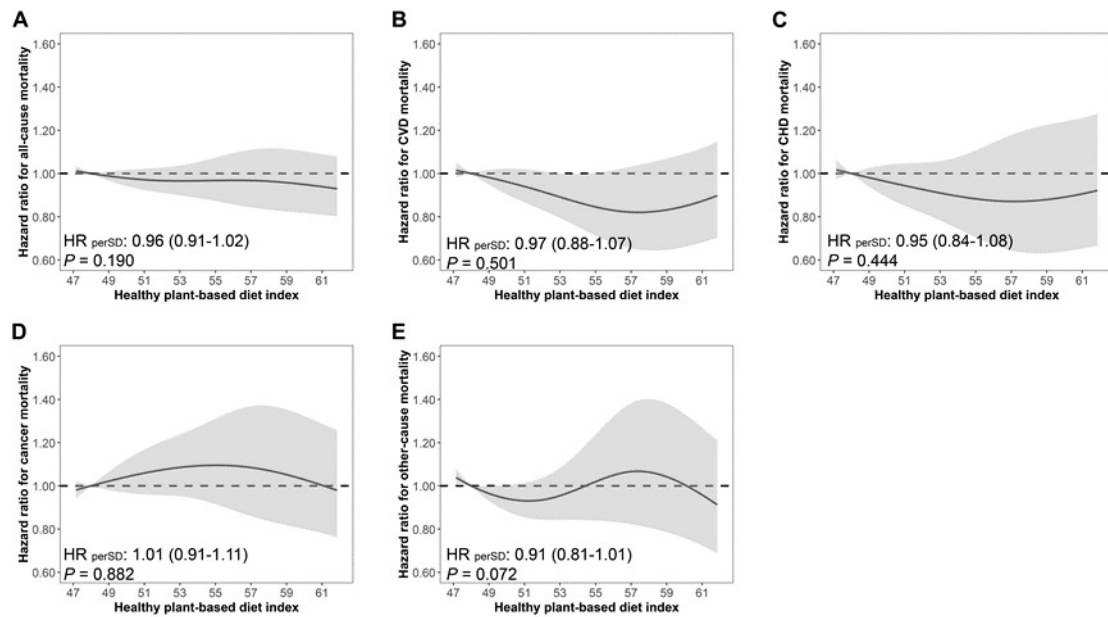

**Figure S4.** Dose-Response Relationships between hPDI and All-Cause and Cause-Specific Mortality. Hazard ratios of total mortality (A), CVD mortality (B), CHD mortality (C), cancer mortality (D), and other-cause mortality (E) according to hPDI were estimated by restricted cubic spline regressions. The multivariable model was adjusted for age, sex, race, centers, BMI, household income, Townsend deprivation index, total energy intake, smoking status, alcohol consumption, physical activity, history of hypertension, history of hypercholesterolemia, history of diabetes, family history of cardiovascular disease, vitamin supplement use, mineral supplement use, aspirin use, lipid-lowering drug use, and CVD duration. Shaded areas represent 95% confidence intervals.

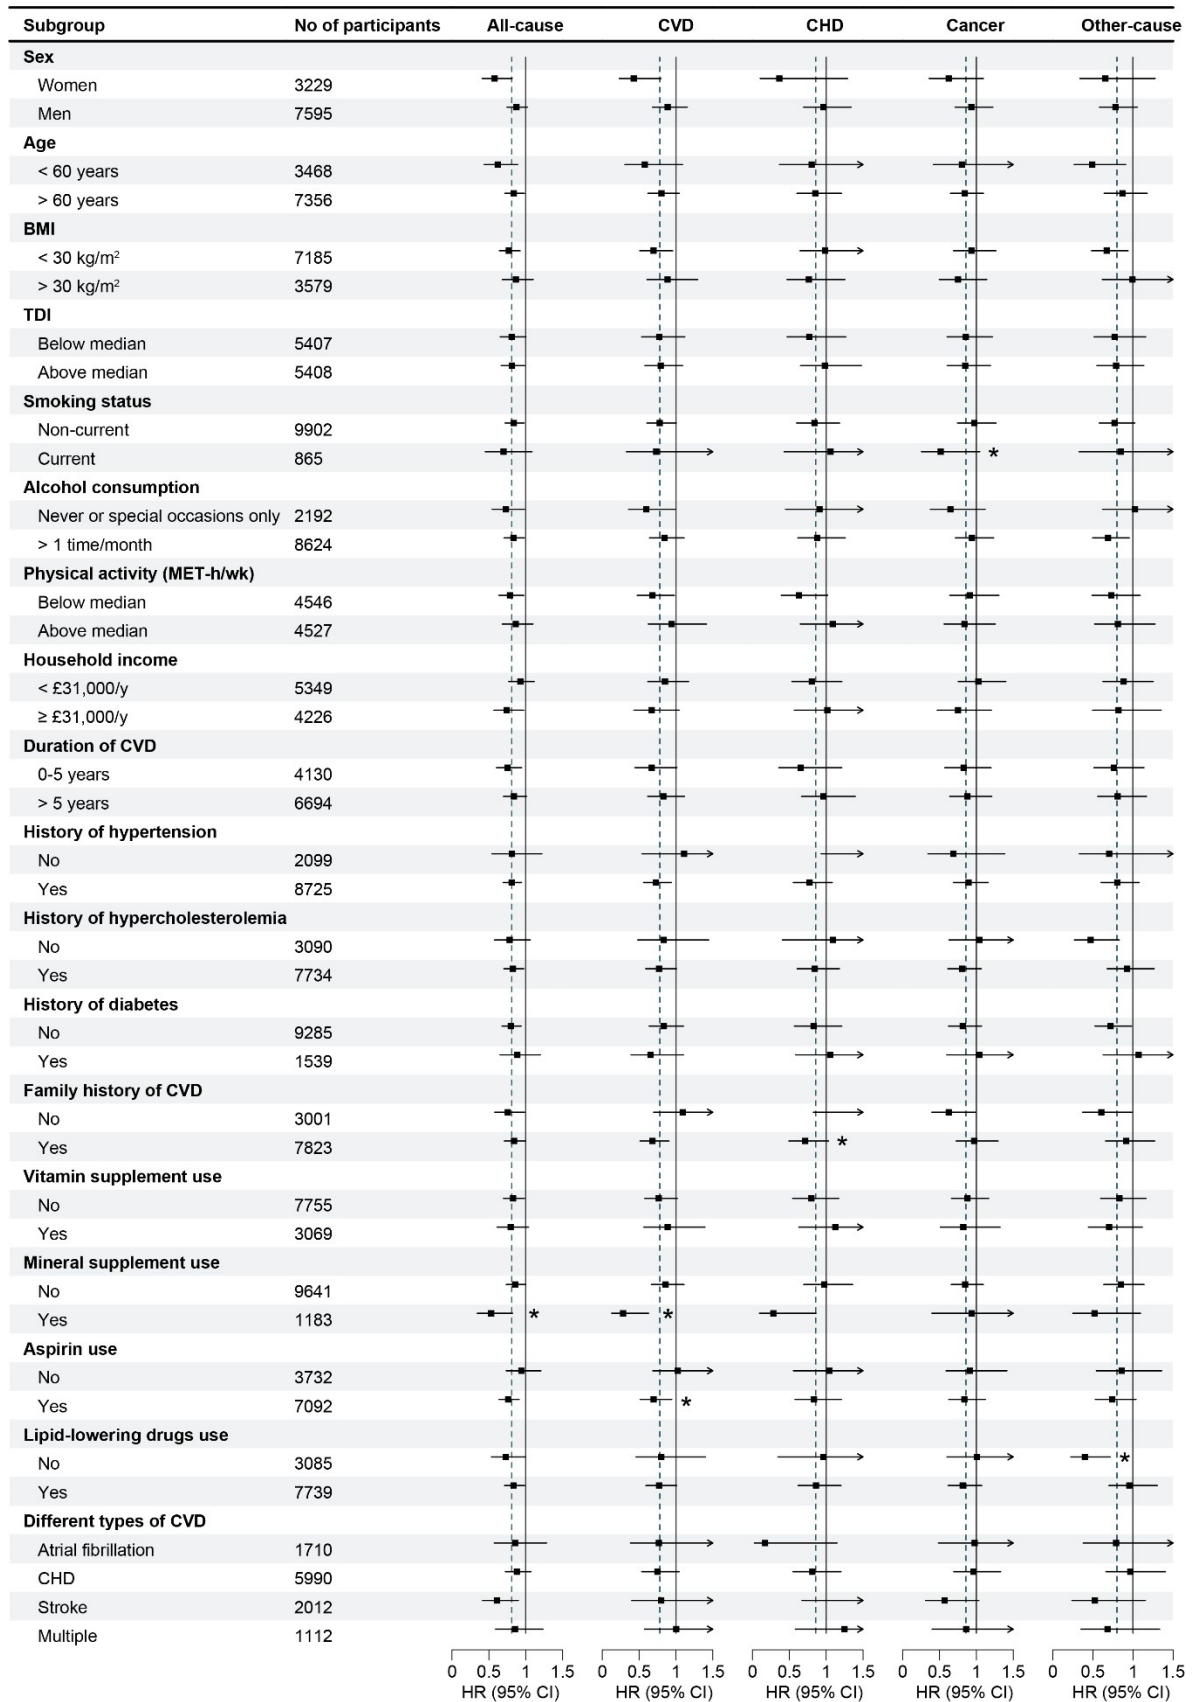

**Figure S5.** Associations of PDI with All-Cause and Cause-Specific Mortality Stratified by Potential Risk Factors. BMI = body mass index; MET = metabolic equivalent of

task; TDI = Townsend deprivation index. HRs were adjusted for age, sex, race, centers, BMI, household income, Townsend deprivation index, total energy intake, smoking status, alcohol consumption, physical activity, history of hypertension, history of hypercholesterolemia, history of diabetes, family history of cardiovascular disease, vitamin supplement use, mineral supplement use, aspirin use, lipid-lowering drug use and CVD duration. \**P* for interaction<0.05.

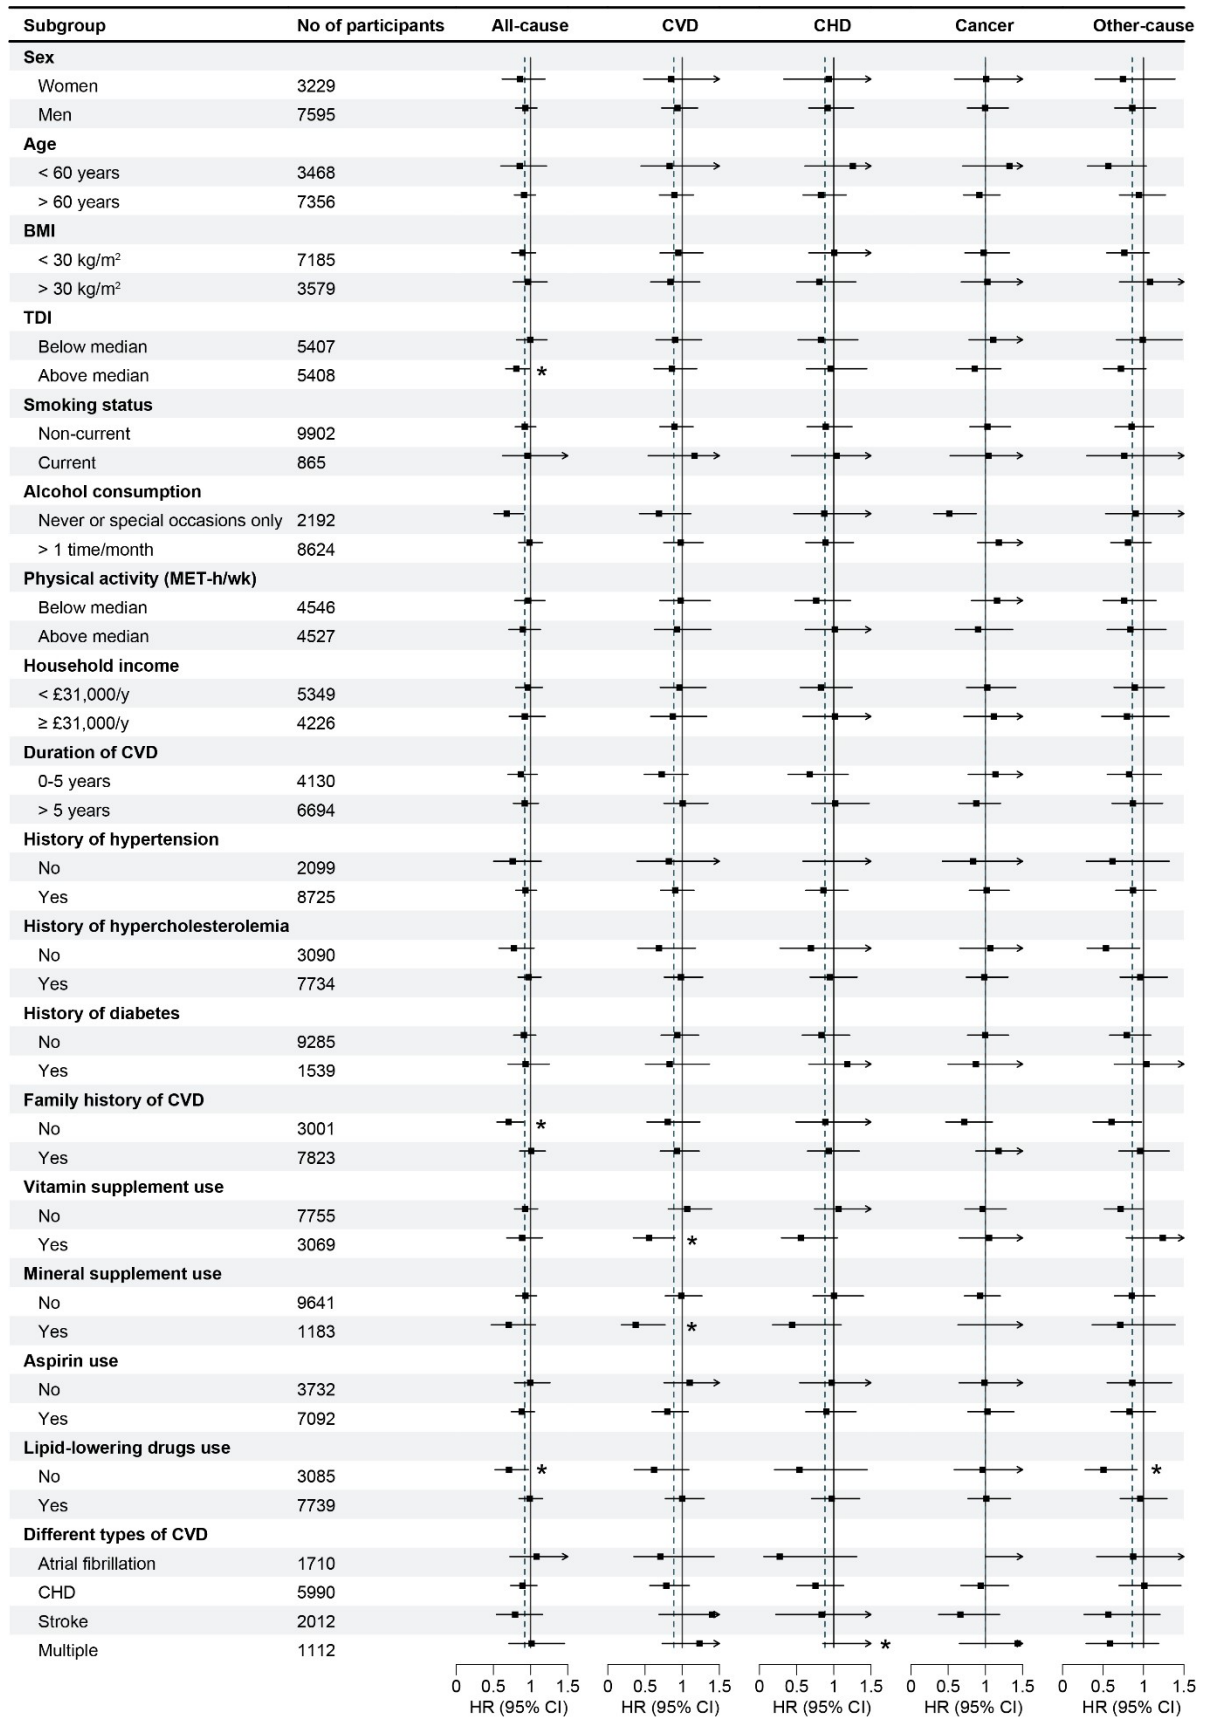

**Figure S6.** Associations of hPDI with All-Cause and Cause-Specific Mortality Stratified by Potential Risk Factors. BMI = body mass index; MET = metabolic



equivalent of task; TDI = Townsend deprivation index. HRs were adjusted for age, sex, race, centers, BMI, household income, Townsend deprivation index, total energy intake, smoking status, alcohol consumption, physical activity, history of hypertension, history of hypercholesterolemia, history of diabetes, family history of cardiovascular disease, vitamin supplement use, mineral supplement use, aspirin use, lipid-lowering drug use and CVD duration. \**P* for interaction<0.05.

**Table S1.** Codes Used in the UK Biobank to Identify Death and Relevant Diseases.

|                              |                              | <b>ICD-9</b>                               | <b>ICD-10</b>         | <b>OPCS-4</b>                  | <b>Self-reported fields</b>                      |
|------------------------------|------------------------------|--------------------------------------------|-----------------------|--------------------------------|--------------------------------------------------|
|                              | Coronary Heart Disease (CHD) | 410, 411, 412,<br>413, 414                 | I20-25                | K40-K46, K49, K50,<br>K75      | 6150 (1), 3894, 20004<br>(1070,1095,1523)        |
| Cardiovascular disease (CVD) | Atrial Fibrillation (AF)     | 4273                                       | I48                   | K621, K622, K623               | 20002 (1471, 1483)                               |
|                              | Stroke                       | 430, 431, 434,<br>4340, 4341,<br>4349, 436 | I60, I61, I63,<br>I64 | A052-A054, L351,<br>L353, L343 | 6150 (3), 4056, 20002<br>(1081,1491, 1583, 1086) |
| CVD death                    |                              | -                                          | I00-I99               | -                              | -                                                |
| CHD death                    |                              |                                            | I20-25                |                                |                                                  |
| Cancer death                 |                              | -                                          | C00-C969,<br>D00-D489 | -                              | -                                                |

**Table S2.** The original names of covariates in UK Biobank

| <b>Covariates</b>               | <b>Filed ID</b> | <b>Source</b>                                                                                                                                                                                            |
|---------------------------------|-----------------|----------------------------------------------------------------------------------------------------------------------------------------------------------------------------------------------------------|
| Age                             | 21003           | Age when attended assessment centre                                                                                                                                                                      |
| Sex                             | 31              | Sex                                                                                                                                                                                                      |
| Race                            | 21000           | Ethnic background                                                                                                                                                                                        |
| Assessment centers              | 54              | UK Biobank assessment centre                                                                                                                                                                             |
| BMI                             | 21001           | Body mass index (BMI)                                                                                                                                                                                    |
| Household income                | 738             | Average total household income before tax                                                                                                                                                                |
| TDI                             | 22189           | Townsend deprivation index at recruitment                                                                                                                                                                |
| Smoking                         | 20116           | Smoking status                                                                                                                                                                                           |
| Alcohol drinking                | 1558            | Alcohol intake frequency                                                                                                                                                                                 |
| Physical activity               | 22037           | MET minutes per week for walking;                                                                                                                                                                        |
|                                 | 22038           | MET minutes per week for moderate                                                                                                                                                                        |
|                                 | 22039           | activity;<br>MET minutes per week for vigorous<br>activity                                                                                                                                               |
| History of hypertension         | 41271           | Diagnoses - ICD9;                                                                                                                                                                                        |
|                                 | 41270           | Diagnoses - ICD10;                                                                                                                                                                                       |
|                                 | 2966            | Age high blood pressure diagnosed;                                                                                                                                                                       |
|                                 | 6150            | Vascular/heart problems diagnosed by                                                                                                                                                                     |
|                                 | 4080            | doctor;                                                                                                                                                                                                  |
|                                 | 4079            | Systolic blood pressure, automated                                                                                                                                                                       |
|                                 | 6153            | reading;                                                                                                                                                                                                 |
|                                 | 6177            | Diastolic blood pressure, automated                                                                                                                                                                      |
|                                 | 20002           | reading;<br>Medication for cholesterol, blood pressure,<br>diabetes, or take exogenous hormones;<br>Medication for cholesterol, blood pressure<br>or diabetes;<br>Non-cancer illness code, self-reported |
| History of hypercholesterolemia | 20002           | Non-cancer illness code, self-reported;                                                                                                                                                                  |
|                                 | 6153            | Medication for cholesterol, blood pressure,<br>diabetes, or take exogenous hormones;                                                                                                                     |
|                                 | 6177            | Medication for cholesterol, blood pressure<br>or diabetes;                                                                                                                                               |
| Family history of CVD           | 20107           | Illnesses of father;                                                                                                                                                                                     |
|                                 | 20110           | Illnesses of mother;                                                                                                                                                                                     |
|                                 | 20111           | Illnesses of siblings                                                                                                                                                                                    |

---

|                         |                |                                                            |
|-------------------------|----------------|------------------------------------------------------------|
| History of diabetes     | 41271          | Diagnoses - ICD9;                                          |
|                         | 41270          | Diagnoses - ICD10;                                         |
|                         | 2443           | Diabetes diagnosed by doctor;                              |
|                         | 2976           | Age diabetes diagnosed;                                    |
|                         | 20003          | Treatment/medication code;                                 |
|                         | 6153           | Medication for cholesterol, blood pressure,                |
|                         | 6177           | diabetes, or take exogenous hormones;                      |
|                         | 20002          | Medication for cholesterol, blood pressure<br>or diabetes; |
|                         |                | Non-cancer illness code, self-reported                     |
| Vitamin supplementation | 6155           | Vitamin and mineral supplements                            |
| Mineral supplementation | 6179           | Mineral and other dietary supplements                      |
| Aspirin use             | 6154           | Medication for pain relief, constipation,<br>heartburn     |
| Lipid-lowering drugs    | 20003          | Treatment/medication code                                  |
| Energy intake           | 26002          | Energy                                                     |
| CVD duration            | 53             | Date of attending assessment centre;                       |
|                         | 41281          | Date of first in-patient diagnosis - ICD9;                 |
|                         | 41280          | Date of first in-patient diagnosis - ICD10;                |
|                         | 41282          | Date of first operative procedure - OPCS4;                 |
|                         | 3894           | Age heart attack diagnosed;                                |
|                         | 4056           | Age stroke diagnosed;                                      |
|                         | 42000          | Date of myocardial infarction;                             |
| 42006                   | Date of stroke |                                                            |

---

**Table S3.** The percentages of participants with missing covariates.

| <b>Covariates</b>            | <b>N</b> | <b>%</b> |
|------------------------------|----------|----------|
| Ethnicity                    | 46       | 0.42     |
| BMI                          | 60       | 0.55     |
| Townsend deprivation index   | 9        | 0.08     |
| Household income             | 1249     | 11.54    |
| Smoking status               | 57       | 0.53     |
| Alcohol consumption          | 8        | 0.07     |
| Physical activity (MET-h/wk) | 1751     | 16.18    |

BMI=body mass index; MET=metabolic equivalent task.

**Table S4.** Basic Characteristics of Participants According to Tertiles of healthy Plant-Based Diet Index (hPDI) in the UK Biobank Cohort.

| Characteristics                          | Tertiles of hPDI |             |             | P value |
|------------------------------------------|------------------|-------------|-------------|---------|
|                                          | T1               | T2          | T3          |         |
| N                                        | 3343             | 3939        | 3542        |         |
| Age (yr)                                 | 60.2 ± 6.7       | 61.1 ± 6.2  | 61.5 ± 6.0  | <0.001  |
| Male (%)                                 | 2563 (76.7)      | 2783 (70.7) | 2249 (63.5) | <0.001  |
| Race (%)                                 |                  |             |             | 0.002   |
| White                                    | 3230 (96.6)      | 3783 (96.0) | 3364 (95.0) |         |
| Non-white                                | 95 (2.8)         | 142 (3.6)   | 164 (4.6)   |         |
| BMI (kg/m <sup>2</sup> )                 | 29.3 ± 5.1       | 28.7 ± 4.9  | 28.2 ± 4.7  | <0.001  |
| Physical activity (MET-h/wk)             | 36.3 ± 39.9      | 39.5 ± 40.6 | 44.1 ± 42.0 | <0.001  |
| Household income (£) (%)                 |                  |             |             | 0.319   |
| < 18,000*                                | 789 (23.6)       | 917 (23.3)  | 866 (24.5)  |         |
| 18,000 to 30,999                         | 813 (24.3)       | 1031 (26.2) | 933 (26.3)  |         |
| 31,000 to 51,999                         | 745 (22.3)       | 845 (21.5)  | 723 (20.4)  |         |
| 52,000 to 100,000                        | 471 (14.1)       | 553 (14.0)  | 475 (13.4)  |         |
| > 100,000                                | 143 (4.3)        | 147 (3.7)   | 124 (3.5)   |         |
| Townsend deprivation index               | -1.2 ± 3.0       | -1.4 ± 3.0  | -1.5 ± 3.0  | <0.001  |
| Smoking (%)                              |                  |             |             | <0.001  |
| Never                                    | 1351 (40.4)      | 1668 (42.4) | 1570 (44.3) |         |
| Previous                                 | 1637 (49.0)      | 1913 (48.6) | 1763 (49.8) |         |
| Current                                  | 337 (10.1)       | 327 (8.3)   | 201 (5.7)   |         |
| Alcohol drinking (%)                     |                  |             |             | 0.095   |
| less than 1- 3 times/month               | 996 (29.8)       | 1195 (30.3) | 1131 (31.9) |         |
| 1-2 times/week                           | 746 (22.3)       | 894 (22.7)  | 834 (23.6)  |         |
| 3-4 times/week                           | 742 (22.2)       | 893 (22.7)  | 773 (21.8)  |         |
| daily or almost daily                    | 857 (25.6)       | 952 (24.2)  | 803 (22.7)  |         |
| History of hypertension (%)              | 2724 (81.5)      | 3178 (80.7) | 2823 (79.7) | 0.172   |
| History of hypercholesterolemia (%)      | 2399 (71.8)      | 2836 (72.0) | 2499 (70.6) | 0.345   |
| History of diabetes (%)                  | 491 (14.7)       | 558 (14.2)  | 490 (13.8)  | 0.595   |
| Family history of CVD (%)                | 29 (30.2)        | 27 (36.9)   | 28 (32.8)   | 0.048   |
| Aspirin use (%)                          | 2139 (64.0)      | 2622 (66.6) | 2331 (65.8) | 0.064   |
| Lipid-lowering drugs (%)                 | 2394 (71.6)      | 2836 (72.0) | 2509 (70.8) | 0.531   |
| Vitamin supplementation (%)              | 899 (26.9)       | 1084 (27.5) | 1086 (30.7) | <0.001  |
| Mineral supplementation (%)              | 309 (9.2)        | 382 (9.7)   | 492 (13.9)  | <0.001  |
| Diet components (servings/d)             |                  |             |             |         |
| Whole grains                             | 2.3 ± 1.3        | 3.0 ± 1.4   | 3.6 ± 1.3   | <0.001  |
| Fruits                                   | 2.4 ± 1.3        | 3.0 ± 1.4   | 3.7 ± 1.3   | <0.001  |
| Vegetables                               | 2.5 ± 1.3        | 2.9 ± 1.4   | 3.5 ± 1.4   | <0.001  |
| Nuts                                     | 2.3 ± 0.9        | 2.6 ± 1.2   | 2.9 ± 1.4   | <0.001  |
| Legumes, Vegetarian protein alternatives | 3.0 ± 1.1        | 3.1 ± 1.2   | 3.4 ± 1.3   | <0.001  |

|                                         |                |                |                |        |
|-----------------------------------------|----------------|----------------|----------------|--------|
| Refined grains                          | 3.7 ± 1.3      | 2.9 ± 1.4      | 2.2 ± 1.3      | <0.001 |
| Vegetable oils                          | 3.2 ± 0.6      | 3.4 ± 0.8      | 3.5 ± 0.9      | <0.001 |
| Potatoes                                | 3.0 ± 1.3      | 2.8 ± 1.3      | 2.5 ± 1.4      | <0.001 |
| Sugary drink                            | 3.4 ± 1.3      | 2.8 ± 1.2      | 2.4 ± 0.9      | <0.001 |
| Fruit juice                             | 3.3 ± 1.3      | 3.0 ± 1.3      | 2.6 ± 1.1      | <0.001 |
| Tea and coffee                          | 3.3 ± 1.4      | 2.9 ± 1.4      | 2.5 ± 1.3      | <0.001 |
| Sweets and desserts                     | 3.5 ± 1.3      | 3.1 ± 1.4      | 2.5 ± 1.4      | <0.001 |
| Animal fat                              | 2.6 ± 1.4      | 3.3 ± 1.2      | 3.6 ± 0.9      | <0.001 |
| Dairy                                   | 2.8 ± 1.4      | 3.0 ± 1.4      | 3.2 ± 1.4      | <0.001 |
| Eggs                                    | 2.7 ± 1.3      | 3.1 ± 1.2      | 3.4 ± 1.1      | <0.001 |
| Fish or seafood                         | 2.8 ± 1.3      | 2.9 ± 1.3      | 3.1 ± 1.3      | <0.001 |
| Meat                                    | 2.4 ± 1.3      | 2.9 ± 1.4      | 3.4 ± 1.4      | <0.001 |
| Miscellaneous animal-based foods        | 2.7 ± 0.7      | 2.8 ± 0.5      | 2.9 ± 0.4      | <0.001 |
| Plant-based diet index (PDI)            | 51.5 ± 5.2     | 53.8 ± 5.3     | 56.1 ± 5.0     | <0.001 |
| Healthy plant-based diet index (hPDI)   | 47.6 ± 3.1     | 54.5 ± 1.7     | 61.5 ± 3.2     | <0.001 |
| Unhealthy plant-based diet index (uPDI) | 56.6 ± 5.5     | 53.7 ± 5.3     | 49.7 ± 5.3     | <0.001 |
| Total energy intake (kcal/d)            | 2327.0 ± 756.0 | 2090.2 ± 662.8 | 1975.9 ± 628.4 | <0.001 |
| Cardiovascular disease duration (yr)    | 8.0 ± 6.1      | 7.7 ± 6.0      | 7.6 ± 6.1      | 0.004  |

Data are expressed as either number (percentage) for categorical variables or mean (SD) for continuous variables unless indicated otherwise. P values for continuous and categorical variables were calculated by the analysis of variance and chi-squared tests separately.

\*£1.00=\$1.30, €1.20.

**Table S5.** Basic Characteristics of Participants According to Tertiles of unhealthy Plant-Based Diet Index (uPDI) in the UK Biobank Cohort.

| Characteristics                          | Tertiles of uPDI |             |             | P value |
|------------------------------------------|------------------|-------------|-------------|---------|
|                                          | T1               | T2          | T3          |         |
| N                                        | 3493             | 3397        | 3934        |         |
| Age (yr)                                 | 61.7 ± 5.7       | 61.0 ± 6.3  | 60.3 ± 6.7  | <0.001  |
| Male (%)                                 | 2234 (64.0)      | 2436 (71.7) | 2925 (74.4) | 0.040   |
| Race (%)                                 |                  |             |             | 0.052   |
| White                                    | 3368 (96.4)      | 3267 (96.2) | 3742 (95.1) |         |
| Non-white                                | 113 (3.2)        | 119 (3.5)   | 169 (4.3)   |         |
| BMI (kg/m <sup>2</sup> )                 | 28.5 ± 5.0       | 28.6 ± 4.9  | 28.9 ± 4.9  | <0.001  |
| Physical activity (MET-h/wk)             | 43.4 ± 41.8      | 39.9 ± 40.4 | 37.0 ± 40.6 | <0.001  |
| Household income (£) (%)                 |                  |             |             | <0.001  |
| < 18,000*                                | 778 (22.3)       | 748 (22.0)  | 1046 (26.6) |         |
| 18,000 to 30,999                         | 927 (26.5)       | 890 (26.2)  | 960 (24.4)  |         |
| 31,000 to 51,999                         | 780 (22.3)       | 722 (21.3)  | 811 (20.6)  |         |
| 52,000 to 100,000                        | 489 (14.0)       | 499 (14.7)  | 511 (13.0)  |         |
| > 100,000                                | 137 (3.9)        | 144 (4.2)   | 133 (3.4)   |         |
| Townsend deprivation index               | -1.6 ± 2.9       | -1.5 ± 2.9  | -1.1 ± 3.1  | <0.001  |
| Smoking (%)                              |                  |             |             | <0.001  |
| Never                                    | 1497 (42.9)      | 1419 (41.8) | 1673 (42.5) |         |
| Previous                                 | 1790 (51.3)      | 1701 (50.1) | 1822 (46.3) |         |
| Current                                  | 192 (5.5)        | 260 (7.7)   | 413 (10.5)  |         |
| Alcohol drinking (%)                     |                  |             |             | <0.001  |
| less than 1- 3 times/month               | 1015 (29.1)      | 1009 (29.7) | 1298 (33.0) |         |
| 1-2 times/week                           | 781 (22.4)       | 777 (22.9)  | 916 (23.3)  |         |
| 3-4 times/week                           | 813 (23.3)       | 797 (23.5)  | 798 (20.3)  |         |
| daily or almost daily                    | 882 (25.3)       | 813 (23.9)  | 917 (23.3)  |         |
| History of hypertension (%)              | 2776 (79.5)      | 2741 (80.7) | 3208 (81.6) | 0.079   |
| History of hypercholesterolemia (%)      | 2414 (69.1)      | 2442 (71.9) | 2878 (73.2) | <0.001  |
| History of diabetes (%)                  | 499 (14.3)       | 482 (14.2)  | 558 (14.2)  | 0.991   |
| Family history of CVD (%)                | 2584 (74.0)      | 2462 (72.5) | 2777 (70.6) | 0.005   |
| Aspirin use (%)                          | 2292 (65.6)      | 2265 (66.7) | 2535 (64.4) | 0.131   |
| Lipid-lowering drugs (%)                 | 2411 (69.0)      | 2440 (71.8) | 2888 (73.4) | <0.001  |
| Vitamin supplementation (%)              | 1054 (30.2)      | 989 (29.1)  | 1026 (26.1) | <0.001  |
| Mineral supplementation (%)              | 477 (13.7)       | 353 (10.4)  | 353 (9.0)   | <0.001  |
| Diet components (servings/d)             |                  |             |             |         |
| Whole grains                             | 3.7 ± 1.3        | 3.1 ± 1.4   | 2.3 ± 1.3   | <0.001  |
| Fruits                                   | 3.7 ± 1.3        | 3.0 ± 1.4   | 2.3 ± 1.3   | <0.001  |
| Vegetables                               | 3.7 ± 1.3        | 3.0 ± 1.4   | 2.3 ± 1.3   | <0.001  |
| Nuts                                     | 3.1 ± 1.4        | 2.6 ± 1.2   | 2.3 ± 0.8   | <0.001  |
| Legumes, Vegetarian protein alternatives | 3.5 ± 1.2        | 3.2 ± 1.2   | 2.8 ± 1.1   | <0.001  |
| Refined grains                           | 2.3 ± 1.3        | 2.9 ± 1.4   | 3.5 ± 1.4   | <0.001  |
| Vegetable oils                           | 3.5 ± 0.9        | 3.4 ± 0.8   | 3.3 ± 0.7   | <0.001  |



|                                         |                |                |                |        |
|-----------------------------------------|----------------|----------------|----------------|--------|
| Potatoes                                | 2.7 ± 1.3      | 2.8 ± 1.4      | 2.9 ± 1.4      | <0.001 |
| Sugary drink                            | 2.5 ± 1.0      | 2.8 ± 1.2      | 3.2 ± 1.3      | <0.001 |
| Fruit juice                             | 2.8 ± 1.2      | 3.0 ± 1.3      | 3.1 ± 1.3      | <0.001 |
| Tea and coffee                          | 2.4 ± 1.3      | 2.8 ± 1.4      | 3.3 ± 1.4      | <0.001 |
| Sweets and desserts                     | 2.7 ± 1.3      | 3.0 ± 1.4      | 3.4 ± 1.4      | <0.001 |
| Animal fat                              | 3.0 ± 1.4      | 3.2 ± 1.3      | 3.4 ± 1.1      | <0.001 |
| Dairy                                   | 2.5 ± 1.3      | 3.0 ± 1.4      | 3.5 ± 1.3      | <0.001 |
| Eggs                                    | 2.7 ± 1.3      | 3.1 ± 1.2      | 3.4 ± 1.1      | <0.001 |
| Fish or seafood                         | 2.6 ± 1.3      | 2.9 ± 1.3      | 3.3 ± 1.2      | <0.001 |
| Meat                                    | 2.7 ± 1.4      | 2.9 ± 1.4      | 3.1 ± 1.4      | <0.001 |
| Miscellaneous animal-based foods        | 2.8 ± 0.6      | 2.8 ± 0.6      | 2.9 ± 0.5      | 0.765  |
| Plant-based diet index (PDI)            | 54.0 ± 5.6     | 53.8 ± 5.7     | 53.6 ± 5.3     | <0.001 |
| Healthy plant-based diet index (hPDI)   | 58.2 ± 5.7     | 54.7 ± 5.5     | 51.4 ± 5.3     | <0.001 |
| Unhealthy plant-based diet index (uPDI) | 46.5 ± 3.2     | 53.0 ± 1.4     | 59.6 ± 3.1     | <0.001 |
| Total energy intake (kcal/d)            | 2233.4 ± 757.3 | 2124.1 ± 637.6 | 2032.1 ± 676.5 | <0.001 |
| Cardiovascular disease duration (yr)    | 7.8 ± 6.4      | 7.7 ± 5.9      | 7.8 ± 6.0      | 0.977  |

Data are expressed as either number (percentage) for categorical variables or mean (SD) for continuous variables unless indicated otherwise. P values for continuous and categorical variables were calculated by the analysis of variance and chi-squared tests separately.

\*£1.00=\$1.30, €1.20.

**Table S6.** Basic Characteristics of CVD Patients Included and Excluded in the Study.

| <b>Characteristics</b>                   | <b>Included</b> | <b>Excluded</b> | <b>P value</b> |
|------------------------------------------|-----------------|-----------------|----------------|
| N                                        | 10,824          | 25,256          |                |
| Age (yr)                                 | 61.0±6.3        | 61.7±6.3        | <0.001         |
| Male (%)                                 | 7595 (70.2)     | 16,634 (65.9)   | <0.001         |
| Race (%)                                 |                 |                 | <0.001         |
| White                                    | 10,377 (95.9)   | 23,641 (93.6)   |                |
| Non-white                                | 401 (3.7)       | 1416 (5.6)      |                |
| BMI (kg/m <sup>2</sup> )                 | 28.7±4.9        | 29.3±5.1        | <0.001         |
| Physical activity (MET-h/wk)             | 40.0±41.0       | 42.0±46.4       | <0.001         |
| Household income (£) (%)                 |                 |                 | <0.001         |
| < 18,000*                                | 2572 (23.8)     | 9053 (35.8)     |                |
| 18,000 to 30,999                         | 2777 (25.7)     | 5411 (21.4)     |                |
| 31,000 to 51,999                         | 2313 (21.4)     | 3270 (13.0)     |                |
| 52,000 to 100,000                        | 1499 (13.9)     | 1704 (6.8)      |                |
| > 100,000                                | 414 (3.8)       | 402 (1.6)       |                |
| Townsend deprivation index               | -1.4±3.0        | -0.5±3.4        | <0.001         |
| Smoking (%)                              |                 |                 | <0.001         |
| Never                                    | 4589 (42.4)     | 9825 (38.9)     |                |
| Previous                                 | 5313 (49.1)     | 11,602 (45.9)   |                |
| Current                                  | 865 (8.0)       | 3538 (14.0)     |                |
| Alcohol drinking (%)                     |                 |                 | <0.001         |
| less than 1- 3 times/month               | 3322 (30.7)     | 9647 (38.2)     |                |
| 1-2 times/week                           | 2474 (22.9)     | 6104 (24.2)     |                |
| 3-4 times/week                           | 2408 (22.3)     | 4694 (18.6)     |                |
| daily or almost daily                    | 2612 (24.1)     | 4679 (18.5)     |                |
| History of hypertension (%)              | 8725 (80.6)     | 20,965 (83.0)   | <0.001         |
| History of hypercholesterolemia (%)      | 7734 (71.5)     | 18,223 (72.2)   | 0.179          |
| History of diabetes (%)                  | 1539 (14.2)     | 4490 (17.8)     | <0.001         |
| Family history of CVD (%)                | 7823 (72.3)     | 17,706 (70.1)   | <0.001         |
| Aspirin use (%)                          | 7092 (65.5)     | 16,597 (65.7)   | 0.729          |
| Lipid-lowering drugs (%)                 | 7739 (71.5)     | 18,446 (73.0)   | 0.003          |
| Vitamin supplementation (%)              | 3069 (28.4)     | 6819 (27.0)     | 0.008          |
| Mineral supplementation (%)              | 1183 (10.9)     | 2711 (10.7)     | 0.583          |
| Diet components (servings/d) †           |                 |                 |                |
| Whole grains                             | 1.6±1.6         | 1.5±1.4         | 0.212          |
| Fruits                                   | 2.2±1.8         | 2.3±2.0         | 0.687          |
| Vegetables                               | 2.4±2.3         | 2.5±2.2         | 0.275          |
| Nuts                                     | 0.1±0.4         | 0.1±0.4         | 0.496          |
| Legumes, Vegetarian protein alternatives | 0.4±0.5         | 0.4±0.5         | 0.477          |
| Refined grains                           | 1.3±1.4         | 1.2±1.2         | 0.159          |
| Vegetable oils                           | 0.4±0.9         | 0.3±0.9         | 0.208          |
| Potatoes                                 | 0.6±0.6         | 0.6±0.6         | 0.846          |
| Sugary drink                             | 0.3±0.7         | 0.3±0.7         | 0.875          |

|                                         |              |              |        |
|-----------------------------------------|--------------|--------------|--------|
| Fruit juice                             | 0.3±0.5      | 0.3±0.5      | 0.665  |
| Tea and coffee                          | 4.3±1.8      | 4.3±1.8      | 0.127  |
| Sweets and desserts                     | 2.3±12.2     | 2.3±13.0     | 0.180  |
| Animal fat                              | 0.5±1.1      | 0.6±1.1      | <0.001 |
| Dairy                                   | 1.1±3.4      | 1.1±2.3      | 0.048  |
| Eggs                                    | 0.3±0.5      | 0.3±0.6      | 0.719  |
| Fish or seafood                         | 0.3±0.5      | 0.3±0.5      | 0.724  |
| Meat                                    | 1.2±1.0      | 1.2±1.0      | 0.776  |
| Miscellaneous animal-based foods        | 0.08±0.35    | 0.09±0.39    | 0.819  |
| Plant-based diet index (PDI)            | 53.8±5.5     | 53.4±5.8     | 0.007  |
| Healthy plant-based diet index (hPDI)   | 54.7±6.2     | 54.4±6.1     | 0.180  |
| Unhealthy plant-based diet index (uPDI) | 53.3±6.1     | 53.0±5.9     | 0.125  |
| Total energy intake (kcal/d)            | 2125.5±696.9 | 2137.1±689.4 | 0.635  |
| Cardiovascular disease duration (yr)    | 7.8±6.1      | 7.7±6.2      | 0.593  |

Data are expressed as either number (percentage) for categorical variables or mean (SD) for continuous variables unless indicated otherwise. P values for continuous and categorical variables were calculated by the analysis of variance and chi-squared tests separately.

\*£1.00=\$1.30, €1.20.

†For CVD patients that excluded in the study, only 1242 participants with data of 24h dietary Assessments.

**Table S7.** Basic Characteristics of CVD Patients according to Death in the Study.

| <b>Characteristics</b>                   | <b>The living</b> | <b>Decedent</b> | <b>P value</b> |
|------------------------------------------|-------------------|-----------------|----------------|
| N                                        | 9551              | 1273            |                |
| Age (yr)                                 | 60.6±6.4          | 63.3±5.1        | <0.001         |
| Male (%)                                 | 6565 (68.7)       | 1030 (80.9)     | <0.001         |
| Race (%)                                 |                   |                 | 0.044          |
| White                                    | 9148 (95.8)       | 1229 (96.5)     |                |
| Non-white                                | 366 (3.8)         | 35 (2.8)        |                |
| BMI (kg/m <sup>2</sup> )                 | 28.6±4.9          | 29.2±5.3        | <0.001         |
| Physical activity (MET-h/wk)             | 40.4±40.8         | 37.2±42.2       | 0.017          |
| Household income (£) (%)                 |                   |                 | <0.001         |
| < 18,000*                                | 2155 (22.6)       | 417 (32.8)      |                |
| 18,000 to 30,999                         | 2433 (25.5)       | 344 (27.0)      |                |
| 31,000 to 51,999                         | 2079 (21.8)       | 234 (18.4)      |                |
| 52,000 to 100,000                        | 1390 (14.6)       | 109 (8.6)       |                |
| > 100,000                                | 396 (4.2)         | 18 (1.4)        |                |
| Townsend deprivation index               | -1.4±3.0          | -1.0±3.2        |                |
| Smoking (%)                              |                   |                 | <0.001         |
| Never                                    | 4209 (44.1)       | 380 (29.9)      |                |
| Previous                                 | 4595 (48.1)       | 718 (56.4)      |                |
| Current                                  | 699 (7.3)         | 166 (13.0)      |                |
| Alcohol drinking (%)                     |                   |                 | 0.006          |
| less than 1- 3 times/month               | 2883 (30.2)       | 439 (34.5)      |                |
| 1-2 times/week                           | 2193 (23.0)       | 281 (22.1)      |                |
| 3-4 times/week                           | 2161 (22.6)       | 247 (19.4)      |                |
| daily or almost daily                    | 2306 (24.1)       | 306 (24.0)      |                |
| History of hypertension (%)              | 7608 (79.7)       | 1117 (87.8)     | <0.001         |
| History of hypercholesterolemia (%)      | 6745 (70.6)       | 989 (77.7)      | <0.001         |
| History of diabetes (%)                  | 1223 (12.8)       | 316 (24.8)      | <0.001         |
| Family history of CVD (%)                | 6934 (72.6)       | 889 (69.8)      | 0.040          |
| Aspirin use (%)                          | 6251 (65.5)       | 841 (66.1)      | 0.663          |
| Lipid-lowering drugs (%)                 | 6735 (70.5)       | 1004 (78.9)     | <0.001         |
| Vitamin supplementation (%)              | 2714 (28.4)       | 355 (27.9)      | 0.694          |
| Mineral supplementation (%)              | 1030 (10.8)       | 153 (12.0)      | 0.190          |
| Diet components (servings/d)             |                   |                 |                |
| Whole grains                             | 1.6±1.6           | 1.6±1.7         | 0.983          |
| Fruits                                   | 2.3±1.8           | 2.2±2.0         | 0.225          |
| Vegetables                               | 2.4±2.3           | 2.3±2.4         | 0.038          |
| Nuts                                     | 0.1±0.4           | 0.1±0.4         | 0.410          |
| Legumes, Vegetarian protein alternatives | 0.4±0.5           | 0.4±0.6         | 0.093          |
| Refined grains                           | 1.3±1.4           | 1.4±1.5         | <0.001         |
| Vegetable oils                           | 0.4±0.9           | 0.3±0.9         | 0.212          |
| Potatoes                                 | 0.6±0.6           | 0.6±0.6         | 0.218          |
| Sugary drink                             | 0.3±0.7           | 0.3±0.7         | 0.396          |

|                                         |              |              |        |
|-----------------------------------------|--------------|--------------|--------|
| Fruit juice                             | 0.3±0.5      | 0.3±0.6      | 0.695  |
| Tea and coffee                          | 4.4±1.8      | 4.2±1.8      | 0.003  |
| Sweets and desserts                     | 2.3±11.6     | 2.7±16.2     | 0.251  |
| Animal fat                              | 0.5±1.1      | 0.6±1.2      | 0.019  |
| Dairy                                   | 1.1±3.3      | 1.2±4.3      | 0.283  |
| Eggs                                    | 0.3±0.5      | 0.3±0.5      | 0.810  |
| Fish or seafood                         | 0.3±0.5      | 0.3±0.6      | 0.269  |
| Meat                                    | 1.2±1.0      | 1.3±1.1      | 0.156  |
| Miscellaneous animal-based foods        | 0.1±0.3      | 0.1±0.3      | 0.600  |
| Plant-based diet index (PDI)            | 53.9±5.5     | 53.5±5.5     | 0.032  |
| Healthy plant-based diet index (hPDI)   | 54.7±6.2     | 54.3±6.2     | 0.012  |
| Unhealthy plant-based diet index (uPDI) | 53.2±6.0     | 54.1±6.1     | <0.001 |
| Total energy intake (kcal/d)            | 2122.2±674.4 | 2149.9±846.9 | 0.183  |
| Cardiovascular disease duration (yr)    | 7.6±6.0      | 9.3±6.8      | <0.001 |

Data are expressed as either number (percentage) for categorical variables or mean (SD) for continuous variables unless indicated otherwise. P values for continuous and categorical variables were calculated by the analysis of variance and chi-squared tests separately.

\*£1.00=\$1.30, €1.20.

**Table S8.** Results of Mediation Analyses between Overall PDI and Blood Biomarkers for All-Cause Mortality

| Mediator      | <i>N</i> | Total effect     | Direct effect    | Indirect effect  | Proportion (%) of effect due to mediation (95% CI) | P value |
|---------------|----------|------------------|------------------|------------------|----------------------------------------------------|---------|
| Blood glucose | 9,273    | 0.92 (0.85–0.99) | 0.91 (0.84–0.99) | 1.06 (1.03–1.09) | -                                                  | -       |
| HbA1c         | 10,095   | 0.90 (0.84–0.97) | 0.90 (0.84–0.97) | 1.01 (1.01–1.02) | -                                                  | -       |
| TG            | 10,159   | 0.89 (0.83–0.96) | 0.89 (0.83–0.96) | 0.96 (0.91–1.02) | -                                                  | -       |
| TC            | 10,165   | 0.90 (0.83–0.96) | 0.89 (0.83–0.96) | 0.93 (0.87–1.00) | -                                                  | -       |
| LDL-C         | 10,149   | 0.90 (0.83–0.97) | 0.90 (0.83–0.97) | 0.92 (0.85–1.01) | -                                                  | -       |
| HDL-C         | 9,279    | 0.92 (0.85–0.99) | 0.92 (0.85–0.99) | 0.99 (0.79–1.24) | -                                                  | -       |
| apo A         | 9,266    | 0.92 (0.85–0.99) | 0.91 (0.85–0.99) | 0.89 (0.67–1.19) | -                                                  | -       |
| apo B         | 10,114   | 0.89 (0.83–0.96) | 0.89 (0.83–0.96) | 0.88 (0.65–1.19) | -                                                  | -       |
| Lp(a)         | 7,829    | 0.88 (0.81–0.96) | 0.88 (0.81–0.96) | 0.95 (0.90–1.01) | 3.1% (0.8%-11.8%)                                  | 0.052   |
| CRP           | 10,148   | 0.90 (0.83–0.96) | 0.90 (0.83–0.97) | 1.29 (1.20–1.40) | 2.5% (0.2%-25.6%)                                  | 0.212   |
| Albumin       | 9,287    | 0.91 (0.84–0.99) | 0.91 (0.84–0.98) | 0.94 (0.92–0.96) | -                                                  | -       |

CI, confidence interval; HbA1c, Hemoglobin A1c; TG, triglyceride; TC, total cholesterol; LDL-c, low density lipoprotein-cholesterol; HDL-c, high density lipoprotein-cholesterol; apo A, Apolipoprotein A; apo B, Apolipoprotein B; Lp(a), Lipoprotein A; CRP, C-reactive protein.

**Table S9.** Results of Mediation Analyses between healthy Plant-Based Diet and Blood Biomarkers for All-Cause Mortality.

| Mediator      | <i>N</i> | Total effect     | Direct effect    | Indirect effect  | Proportion (%) of effect due to mediation (95% CI) | P value |
|---------------|----------|------------------|------------------|------------------|----------------------------------------------------|---------|
| Blood glucose | 9,273    | 0.98 (0.91–1.06) | 0.98 (0.91–1.06) | 1.06 (1.02–1.09) | 6.6% (0.0%-94.8%)                                  | 0.277   |
| HbA1c         | 10,095   | 0.97 (0.90–1.04) | 0.97 (0.90–1.05) | 1.01 (1.01–1.02) | 5.8% (0.3%-56.1%)                                  | 0.164   |
| TG            | 10,159   | 0.97 (0.90–1.05) | 0.97 (0.90–1.04) | 0.96 (0.91–1.02) | -                                                  | -       |
| TC            | 10,165   | 0.97 (0.90–1.04) | 0.97 (0.90–1.04) | 0.93 (0.87–1.00) | -                                                  | -       |
| LDL-c         | 10,149   | 0.97 (0.90–1.05) | 0.97 (0.90–1.04) | 0.92 (0.85–1.01) | -                                                  | -       |
| HDL-c         | 9,279    | 0.98 (0.91–1.06) | 0.98 (0.91–1.06) | 1.00 (0.80–1.25) | -                                                  | -       |
| apo A         | 9,266    | 0.98 (0.91–1.06) | 0.98 (0.91–1.06) | 0.90 (0.67–1.20) | -                                                  | -       |
| apo B         | 10,114   | 0.97 (0.90–1.05) | 0.97 (0.90–1.05) | 0.88 (0.65–1.19) | -                                                  | -       |
| Lp(a)         | 7,829    | 0.96 (0.88–1.05) | 0.96 (0.88–1.05) | 0.95 (0.89–1.01) | 3.0% (0.2%-32.3%)                                  | 0.162   |
| CRP           | 10,148   | 0.97 (0.90–1.04) | 0.98 (0.91–1.06) | 1.30 (1.20–1.40) | 42.8% (1.4%-97.5%)                                 | <0.001  |
| Albumin       | 9,287    | 0.98 (0.90–1.06) | 0.98 (0.91–1.06) | 0.94 (0.92–0.96) | 11.6% (0.1%-94.6%)                                 | 0.212   |

CI, confidence interval; HbA1c, Hemoglobin A1c; TG, triglyceride; TC, total cholesterol; LDL-c, low density lipoprotein-cholesterol; HDL-c, high density lipoprotein-cholesterol; apo A, Apolipoprotein A; apo B, Apolipoprotein B; Lp(a), Lipoprotein A; CRP, C-reactive protein.

**Table S10.** Results of Mediation Analyses between Unhealthy Plant-Based Diet and Blood Biomarkers for All-Cause and Cause-Specific Mortality

| <b>Mediator</b>      | <b>N</b> | <b>Total effect</b> | <b>Direct effect</b> | <b>Indirect effect</b> | <b>Proportion (%) of effect due to mediation (95% CI)</b> | <b>P value</b> |
|----------------------|----------|---------------------|----------------------|------------------------|-----------------------------------------------------------|----------------|
| <b>Blood glucose</b> |          |                     |                      |                        |                                                           |                |
| all-cause death      | 9,273    | 1.16 (1.07–1.25)    | 1.16 (1.07–1.25)     | 1.06 (1.02–1.09)       | -                                                         | -              |
| CVD death            | 9,273    | 1.21 (1.06–1.38)    | 1.21 (1.06–1.38)     | 1.07 (1.02–1.13)       | -                                                         | -              |
| CHD death            | 9,273    | 1.35 (1.13–1.60)    | 1.35 (1.13–1.60)     | 1.08 (1.02–1.15)       | -                                                         | -              |
| cancer death         | 9,273    | 1.12 (1.00–1.27)    | 1.13 (1.00–1.27)     | 1.06 (1.00–1.12)       | -                                                         | -              |
| <b>HbA1c</b>         |          |                     |                      |                        |                                                           |                |
| all-cause death      | 10,095   | 1.15 (1.07–1.24)    | 1.15 (1.07–1.24)     | 1.01 (1.01–1.02)       | -                                                         | -              |
| CVD death            | 10,095   | 1.20 (1.06–1.36)    | 1.21 (1.07–1.36)     | 1.02 (1.00–1.03)       | -                                                         | -              |
| CHD death            | 10,095   | 1.29 (1.09–1.52)    | 1.29 (1.10–1.52)     | 1.02 (1.00–1.03)       | -                                                         | -              |
| cancer death         | 10,095   | 1.12 (1.00–1.26)    | 1.12 (1.00–1.26)     | 1.01 (1.00–1.03)       | -                                                         | -              |
| <b>TG</b>            |          |                     |                      |                        |                                                           |                |
| all-cause death      | 10,159   | 1.15 (1.07–1.23)    | 1.15 (1.07–1.23)     | 0.96 (0.90–1.01)       | -                                                         | -              |
| CVD death            | 10,159   | 1.20 (1.06–1.36)    | 1.20 (1.06–1.36)     | 1.02 (0.93–1.11)       | -                                                         | -              |
| CHD death            | 10,159   | 1.29 (1.09–1.52)    | 1.28 (1.09–1.51)     | 1.08 (0.97–1.20)       | 1.7% (0.3%-8.1%)                                          | 0.104          |
| cancer death         | 10,159   | 1.11 (0.99–1.25)    | 1.11 (0.99–1.25)     | 0.95 (0.86–1.05)       | -                                                         | -              |
| <b>TC</b>            |          |                     |                      |                        |                                                           |                |
| all-cause death      | 10,165   | 1.15 (1.07–1.23)    | 1.15 (1.07–1.23)     | 0.94 (0.88–1.00)       | -                                                         | -              |



|                 |        |                  |                  |                  |                   |       |
|-----------------|--------|------------------|------------------|------------------|-------------------|-------|
| CVD death       | 10,165 | 1.20 (1.06–1.36) | 1.20 (1.06–1.36) | 1.04 (0.94–1.16) | -                 | -     |
| CHD death       | 10,165 | 1.29 (1.09–1.52) | 1.29 (1.09–1.52) | 1.17 (1.02–1.34) | -                 | -     |
| cancer death    | 10,165 | 1.11 (0.99–1.25) | 1.11 (0.99–1.25) | 0.88 (0.78–0.98) | -                 | -     |
| <b>LDL-c</b>    |        |                  |                  |                  |                   |       |
| all-cause death | 10,149 | 1.15 (1.07–1.23) | 1.15 (1.07–1.23) | 0.93 (0.85–1.01) | -                 | -     |
| CVD death       | 10,149 | 1.21 (1.07–1.36) | 1.21 (1.07–1.36) | 1.10 (0.95–1.26) | -                 | -     |
| CHD death       | 10,149 | 1.29 (1.10–1.52) | 1.29 (1.10–1.52) | 1.29 (1.07–1.55) | -                 | -     |
| cancer death    | 10,149 | 1.11 (0.99–1.25) | 1.11 (0.99–1.25) | 0.87 (0.75–1.02) | -                 | -     |
| <b>HDL-c</b>    |        |                  |                  |                  |                   |       |
| all-cause death | 9,279  | 1.16 (1.07–1.25) | 1.16 (1.07–1.25) | 1.02 (0.82–1.27) | -                 | -     |
| CVD death       | 9,279  | 1.21 (1.06–1.38) | 1.21 (1.06–1.38) | 0.93 (0.64–1.36) | -                 | -     |
| CHD death       | 9,279  | 1.35 (1.13–1.61) | 1.34 (1.12–1.60) | 0.73 (0.43–1.24) | 1.8% (0.3%-9.7%)  | 0.117 |
| cancer death    | 9,279  | 1.12 (1.00–1.27) | 1.12 (0.99–1.26) | 0.74 (0.51–1.09) | 4.0% (0.6%-21.7%) | 0.087 |
| <b>apo A</b>    |        |                  |                  |                  |                   |       |
| all-cause death | 9,266  | 1.16 (1.07–1.25) | 1.15 (1.07–1.25) | 0.92 (0.68–1.23) | -                 | -     |
| CVD death       | 9,266  | 1.21 (1.06–1.38) | 1.21 (1.06–1.37) | 0.84 (0.51–1.37) | -                 | -     |
| CHD death       | 9,266  | 1.34 (1.12–1.60) | 1.33 (1.12–1.59) | 0.70 (0.36–1.37) | 1.2% (0.1%-9.6%)  | 0.169 |
| cancer death    | 9,266  | 1.12 (1.00–1.27) | 1.12 (0.99–1.26) | 0.65 (0.40–1.07) | 2.7% (0.4%-16.4%) | 0.105 |
| <b>apo B</b>    |        |                  |                  |                  |                   |       |
| all-cause death | 10,114 | 1.15 (1.07–1.23) | 1.15 (1.07–1.23) | 0.88 (0.65–1.19) | -                 | -     |
| CVD death       | 10,114 | 1.21 (1.07–1.37) | 1.21 (1.07–1.37) | 1.52 (0.93–2.48) | -                 | -     |

|                 |        |                  |                  |                  |                   |       |
|-----------------|--------|------------------|------------------|------------------|-------------------|-------|
| CHD death       | 10,114 | 1.28 (1.09–1.51) | 1.28 (1.09–1.51) | 2.72 (1.45–5.10) | -                 | -     |
| cancer death    | 10,114 | 1.11 (0.99–1.24) | 1.11 (0.99–1.24) | 0.80 (0.48–1.34) | -                 | -     |
| <b>Lp(a)</b>    |        |                  |                  |                  |                   |       |
| all-cause death | 7,829  | 1.14 (1.05–1.23) | 1.14 (1.05–1.23) | 0.95 (0.89–1.00) | -                 | -     |
| CVD death       | 7,829  | 1.21 (1.05–1.40) | 1.21 (1.05–1.40) | 0.99 (0.90–1.10) | -                 | -     |
| CHD death       | 7,829  | 1.26 (1.04–1.53) | 1.26 (1.04–1.54) | 0.96 (0.84–1.10) | -                 | -     |
| cancer death    | 7,829  | 1.09 (0.96–1.24) | 1.09 (0.96–1.24) | 0.95 (0.86–1.05) | -                 | -     |
| <b>CRP</b>      |        |                  |                  |                  |                   |       |
| all-cause death | 10,148 | 1.15 (1.07–1.23) | 1.14 (1.06–1.22) | 1.29 (1.19–1.40) | 6.1% (2.3%-15.1%) | 0.009 |
| CVD death       | 10,148 | 1.20 (1.06–1.36) | 1.19 (1.06–1.35) | 1.27 (1.11–1.45) | 4.0% (1.2%-12.1%) | 0.025 |
| CHD death       | 10,148 | 1.29 (1.10–1.53) | 1.28 (1.09–1.51) | 1.28 (1.08–1.52) | 3.3% (0.9%-11.4%) | 0.047 |
| cancer death    | 10,148 | 1.11 (0.99–1.25) | 1.11 (0.99–1.24) | 1.20 (1.04–1.37) | 5.2% (1.1%-22.2%) | 0.040 |
| <b>Albumin</b>  |        |                  |                  |                  |                   |       |
| all-cause death | 9,287  | 1.15 (1.07–1.25) | 1.15 (1.06–1.24) | 0.94 (0.92–0.96) | 3.8% (1.3%-11.6%) | 0.023 |
| CVD death       | 9,287  | 1.21 (1.06–1.38) | 1.20 (1.06–1.37) | 0.95 (0.91–0.98) | 2.4% (0.6%-9.5%)  | 0.065 |
| CHD death       | 9,287  | 1.33 (1.12–1.59) | 1.33 (1.12–1.58) | 0.97 (0.92–1.01) | 1.0% (0.1%-7.5%)  | 0.155 |
| cancer death    | 9,287  | 1.12 (1.00–1.27) | 1.12 (0.99–1.26) | 0.96 (0.93–1.00) | 2.7% (0.4%-16.1%) | 0.103 |

CI, confidence interval; HbA1c, Hemoglobin A1c; TG, triglyceride; TC, total cholesterol; LDL-c, low density lipoprotein-cholesterol; HDL-c, high density lipoprotein-cholesterol; apo A, Apolipoprotein A; apo B, Apolipoprotein B; Lp(a), Lipoprotein A; CRP, C-reactive protein.

**Table S11.** Sensitivity Analyses for Multivariable Hazard Ratios (95% CIs) of Mortality According to PDI.

|                                                                | Tertile of plant-based diet index |                  |                  | P for trend  |
|----------------------------------------------------------------|-----------------------------------|------------------|------------------|--------------|
|                                                                | T1                                | T2               | T3               |              |
| <b>Excluding participants with extreme BMI</b>                 |                                   |                  |                  |              |
| No. of participants                                            | 3440                              | 3678             | 3294             |              |
| <b>All-cause mortality</b>                                     |                                   |                  |                  |              |
| No. of cases                                                   | 428                               | 429              | 349              |              |
| Multivariable-adjusted HR (95% CI)                             | 1 (Ref.)                          | 0.91 (0.79–1.04) | 0.80 (0.69–0.93) | <b>0.003</b> |
| <b>CVD mortality</b>                                           |                                   |                  |                  |              |
| No. of cases                                                   | 157                               | 145              | 123              |              |
| Multivariable-adjusted HR (95% CI)                             | 1 (Ref.)                          | 0.85 (0.67–1.06) | 0.79 (0.62–1.01) | 0.060        |
| <b>CHD mortality</b>                                           |                                   |                  |                  |              |
| No. of cases                                                   | 90                                | 81               | 73               |              |
| Multivariable-adjusted HR (95% CI)                             | 1 (Ref.)                          | 0.83 (0.61–1.13) | 0.88 (0.64–1.22) | 0.423        |
| <b>Cancer mortality</b>                                        |                                   |                  |                  |              |
| No. of cases                                                   | 152                               | 161              | 126              |              |
| Multivariable-adjusted HR (95% CI)                             | 1 (Ref.)                          | 0.97 (0.77–1.21) | 0.83 (0.65–1.06) | 0.134        |
| <b>Other-cause mortality</b>                                   |                                   |                  |                  |              |
| No. of cases                                                   | 119                               | 123              | 100              |              |
| Multivariable-adjusted HR (95% CI)                             | 1 (Ref.)                          | 0.91 (0.71–1.18) | 0.77 (0.59–1.02) | 0.073        |
| <b>Excluding participants with extreme total energy intake</b> |                                   |                  |                  |              |
| No. of participants                                            | 3581                              | 3764             | 3348             |              |
| <b>All-cause mortality</b>                                     |                                   |                  |                  |              |

|                                                         |          |                  |                  |              |
|---------------------------------------------------------|----------|------------------|------------------|--------------|
| No. of cases                                            | 447      | 444              | 361              |              |
| Multivariable-adjusted HR (95% CI)                      | 1 (Ref.) | 0.92 (0.81–1.06) | 0.82 (0.71–0.94) | <b>0.007</b> |
| <b>CVD mortality</b>                                    |          |                  |                  |              |
| No. of cases                                            | 167      | 156              | 125              |              |
| Multivariable-adjusted HR (95% CI)                      | 1 (Ref.) | 0.89 (0.71–1.11) | 0.79 (0.62–1.01) | 0.055        |
| <b>CHD mortality</b>                                    |          |                  |                  |              |
| No. of cases                                            | 95       | 88               | 73               |              |
| Multivariable-adjusted HR (95% CI)                      | 1 (Ref.) | 0.88 (0.66–1.19) | 0.88 (0.64–1.21) | 0.421        |
| <b>Cancer mortality</b>                                 |          |                  |                  |              |
| No. of cases                                            | 153      | 160              | 130              |              |
| Multivariable-adjusted HR (95% CI)                      | 1 (Ref.) | 0.97 (0.78–1.22) | 0.86 (0.68–1.10) | 0.247        |
| <b>Other-cause mortality</b>                            |          |                  |                  |              |
| No. of cases                                            | 127      | 128              | 106              |              |
| Multivariable-adjusted HR (95% CI)                      | 1 (Ref.) | 0.91 (0.71–1.17) | 0.79 (0.60–1.04) | 0.091        |
| <b>Excluding participants with death within 2 years</b> |          |                  |                  |              |
| No. of participants                                     | 3580     | 3750             | 3358             |              |
| <b>All-cause mortality</b>                              |          |                  |                  |              |
| No. of cases                                            | 407      | 397              | 333              |              |
| Multivariable-adjusted HR (95% CI)                      | 1 (Ref.) | 0.92 (0.81–1.06) | 0.82 (0.71–0.95) | <b>0.009</b> |
| <b>CVD mortality</b>                                    |          |                  |                  |              |
| No. of cases                                            | 144      | 136              | 108              |              |
| Multivariable-adjusted HR (95% CI)                      | 1 (Ref.) | 0.89 (0.71–1.12) | 0.81 (0.63–1.04) | 0.090        |
| <b>CHD mortality</b>                                    |          |                  |                  |              |

|                                    |          |                  |                  |              |
|------------------------------------|----------|------------------|------------------|--------------|
| No. of cases                       | 82       | 77               | 64               |              |
| Multivariable-adjusted HR (95% CI) | 1 (Ref.) | 0.89 (0.66–1.20) | 0.90 (0.65–1.24) | 0.494        |
| <b>Cancer mortality</b>            |          |                  |                  |              |
| No. of cases                       | 142      | 146              | 119              |              |
| Multivariable-adjusted HR (95% CI) | 1 (Ref.) | 0.96 (0.77–1.21) | 0.84 (0.66–1.08) | 0.177        |
| <b>Other-cause mortality</b>       |          |                  |                  |              |
| No. of cases                       | 121      | 115              | 106              |              |
| Multivariable-adjusted HR (95% CI) | 1 (Ref.) | 0.91 (0.71–1.17) | 0.81 (0.62–1.07) | 0.135        |
| <b>Excluding the South Asian</b>   |          |                  |                  |              |
| No. of participants                | 3577     | 3741             | 3337             |              |
| <b>All-cause mortality</b>         |          |                  |                  |              |
| No. of cases                       | 450      | 444              | 361              |              |
| Multivariable-adjusted HR (95% CI) | 1 (Ref.) | 0.92 (0.81–1.05) | 0.81 (0.70–0.94) | <b>0.005</b> |
| <b>CVD mortality</b>               |          |                  |                  |              |
| No. of cases                       | 169      | 157              | 125              |              |
| Multivariable-adjusted HR (95% CI) | 1 (Ref.) | 0.89 (0.71–1.11) | 0.79 (0.62–1.01) | 0.055        |
| <b>CHD mortality</b>               |          |                  |                  |              |
| No. of cases                       | 96       | 88               | 73               |              |
| Multivariable-adjusted HR (95% CI) | 1 (Ref.) | 0.89 (0.66–1.19) | 0.89 (0.64–1.22) | 0.437        |
| <b>Cancer mortality</b>            |          |                  |                  |              |
| No. of cases                       | 156      | 161              | 130              |              |
| Multivariable-adjusted HR (95% CI) | 1 (Ref.) | 0.96 (0.77–1.20) | 0.84 (0.66–1.08) | 0.176        |
| <b>Other-cause mortality</b>       |          |                  |                  |              |

|                                                            |          |                  |                  |              |
|------------------------------------------------------------|----------|------------------|------------------|--------------|
| No. of cases                                               | 125      | 126              | 106              |              |
| Multivariable-adjusted HR (95% CI)                         | 1 (Ref.) | 0.91 (0.71–1.18) | 0.79 (0.60–1.04) | 0.097        |
| <b>Energy-adjusted PDI</b>                                 |          |                  |                  |              |
| No. of participants                                        | 3523     | 3774             | 3527             |              |
| <b>All-cause mortality</b>                                 |          |                  |                  |              |
| No. of cases                                               | 449      | 453              | 371              |              |
| Multivariable-adjusted HR (95% CI)                         | 1 (Ref.) | 0.91 (0.80–1.04) | 0.81 (0.70–0.93) | <b>0.004</b> |
| <b>CVD mortality</b>                                       |          |                  |                  |              |
| No. of cases                                               | 172      | 155              | 130              |              |
| Multivariable-adjusted HR (95% CI)                         | 1 (Ref.) | 0.82 (0.66–1.02) | 0.77 (0.61–0.97) | <b>0.024</b> |
| <b>CHD mortality</b>                                       |          |                  |                  |              |
| No. of cases                                               | 97       | 91               | 74               |              |
| Multivariable-adjusted HR (95% CI)                         | 1 (Ref.) | 0.88 (0.66–1.18) | 0.81 (0.60–1.11) | 0.187        |
| <b>Cancer mortality</b>                                    |          |                  |                  |              |
| No. of cases                                               | 151      | 168              | 133              |              |
| Multivariable-adjusted HR (95% CI)                         | 1 (Ref.) | 1.01 (0.81–1.26) | 0.87 (0.69–1.11) | 0.277        |
| <b>Other-cause mortality</b>                               |          |                  |                  |              |
| No. of cases                                               | 126      | 130              | 108              |              |
| Multivariable-adjusted HR (95% CI)                         | 1 (Ref.) | 0.92 (0.72–1.18) | 0.79 (0.61–1.03) | 0.087        |
| <b>Excluding participants with only one dietary recall</b> |          |                  |                  |              |
| No. of participants                                        | 1886     | 2181             | 2046             |              |
| <b>All-cause mortality</b>                                 |          |                  |                  |              |
| No. of cases                                               | 208      | 245              | 187              |              |

|                                                     |          |                  |                  |              |
|-----------------------------------------------------|----------|------------------|------------------|--------------|
| Multivariable-adjusted HR (95% CI)                  | 1 (Ref.) | 0.99 (0.82–1.20) | 0.78 (0.63–0.96) | <b>0.018</b> |
| <b>CVD mortality</b>                                |          |                  |                  |              |
| No. of cases                                        | 70       | 83               | 57               |              |
| Multivariable-adjusted HR (95% CI)                  | 1 (Ref.) | 1.05 (0.76–1.46) | 0.76 (0.52–1.10) | 0.149        |
| <b>CHD mortality</b>                                |          |                  |                  |              |
| No. of cases                                        | 38       | 52               | 27               |              |
| Multivariable-adjusted HR (95% CI)                  | 1 (Ref.) | 1.20 (0.78–1.85) | 0.73 (0.44–1.21) | 0.254        |
| <b>Cancer mortality</b>                             |          |                  |                  |              |
| No. of cases                                        | 74       | 93               | 80               |              |
| Multivariable-adjusted HR (95% CI)                  | 1 (Ref.) | 1.06 (0.78–1.44) | 0.95 (0.68–1.33) | 0.770        |
| <b>Other-cause mortality</b>                        |          |                  |                  |              |
| No. of cases                                        | 64       | 69               | 50               |              |
| Multivariable-adjusted HR (95% CI)                  | 1 (Ref.) | 0.87 (0.61–1.23) | 0.59 (0.40–0.88) | <b>0.009</b> |
| <b>Further adjusting for glucose-lowering drugs</b> |          |                  |                  |              |
| No. of participants                                 | 3631     | 3803             | 3390             |              |
| <b>All-cause mortality</b>                          |          |                  |                  |              |
| No. of cases                                        | 458      | 450              | 365              |              |
| Multivariable-adjusted HR (95% CI)                  | 1 (Ref.) | 0.92 (0.81–1.05) | 0.81 (0.70–0.94) | <b>0.005</b> |
| <b>CVD mortality</b>                                |          |                  |                  |              |
| No. of cases                                        | 173      | 158              | 126              |              |
| Multivariable-adjusted HR (95% CI)                  | 1 (Ref.) | 0.88 (0.70–1.09) | 0.78 (0.61–0.99) | <b>0.040</b> |
| <b>CHD mortality</b>                                |          |                  |                  |              |
| No. of cases                                        | 99       | 89               | 74               |              |

|                                    |          |                  |                  |       |
|------------------------------------|----------|------------------|------------------|-------|
| Multivariable-adjusted HR (95% CI) | 1 (Ref.) | 0.87 (0.65–1.17) | 0.87 (0.64–1.19) | 0.367 |
| <b>Cancer mortality</b>            |          |                  |                  |       |
| No. of cases                       | 157      | 163              | 132              |       |
| Multivariable-adjusted HR (95% CI) | 1 (Ref.) | 0.97 (0.78–1.21) | 0.86 (0.67–1.09) | 0.219 |
| <b>Other-cause mortality</b>       |          |                  |                  |       |
| No. of cases                       | 128      | 129              | 107              |       |
| Multivariable-adjusted HR (95% CI) | 1 (Ref.) | 0.92 (0.72–1.18) | 0.79 (0.61–1.04) | 0.095 |

\*Glucose-lowering drugs including oral and insulin.

CI = confidence interval; HR = hazard ratio.

The multivariate model was adjusted for age, sex, race, centers, BMI, household income, Townsend deprivation index, total energy intake, smoking status, alcohol consumption, physical activity, history of hypertension, history of hypercholesterolemia, history of diabetes, family history of cardiovascular disease, vitamin supplement use, mineral supplement use, aspirin use, lipid-lowering drug use and CVD duration.



**Table S12.** Sensitivity Analyses for Multivariable Hazard Ratios (95% CIs) of Mortality According to hPDI.

|                                                                | Tertile of healthful plant-based diet index |                  |                  | P for trend |
|----------------------------------------------------------------|---------------------------------------------|------------------|------------------|-------------|
|                                                                | T1                                          | T2               | T3               |             |
| <b>Excluding participants with extreme BMI</b>                 |                                             |                  |                  |             |
| No. of participants                                            | 3195                                        | 3785             | 3432             |             |
| <b>All-cause mortality</b>                                     |                                             |                  |                  |             |
| No. of cases                                                   | 390                                         | 453              | 363              |             |
| Multivariable-adjusted HR (95% CI)                             | 1 (Ref.)                                    | 1.01 (0.88–1.16) | 0.93 (0.80–1.08) | 0.350       |
| <b>CVD mortality</b>                                           |                                             |                  |                  |             |
| No. of cases                                                   | 146                                         | 150              | 129              |             |
| Multivariable-adjusted HR (95% CI)                             | 1 (Ref.)                                    | 0.92 (0.73–1.16) | 0.92 (0.72–1.18) | 0.481       |
| <b>CHD mortality</b>                                           |                                             |                  |                  |             |
| No. of cases                                                   | 87                                          | 86               | 71               |             |
| Multivariable-adjusted HR (95% CI)                             | 1 (Ref.)                                    | 0.91 (0.67–1.24) | 0.91 (0.65–1.26) | 0.524       |
| <b>Cancer mortality</b>                                        |                                             |                  |                  |             |
| No. of cases                                                   | 130                                         | 179              | 130              |             |
| Multivariable-adjusted HR (95% CI)                             | 1 (Ref.)                                    | 1.20 (0.95–1.51) | 1.02 (0.79–1.31) | 0.887       |
| <b>Other-cause mortality</b>                                   |                                             |                  |                  |             |
| No. of cases                                                   | 114                                         | 124              | 104              |             |
| Multivariable-adjusted HR (95% CI)                             | 1 (Ref.)                                    | 0.92 (0.71–1.19) | 0.86 (0.65–1.13) | 0.295       |
| <b>Excluding participants with extreme total energy intake</b> |                                             |                  |                  |             |
| No. of participants                                            | 3300                                        | 3897             | 3496             |             |

|                                                         |          |                  |                  |       |
|---------------------------------------------------------|----------|------------------|------------------|-------|
| <b>All-cause mortality</b>                              |          |                  |                  |       |
| No. of cases                                            | 415      | 463              | 374              |       |
| Multivariable-adjusted HR (95% CI)                      | 1 (Ref.) | 0.97 (0.85–1.11) | 0.92 (0.79–1.06) | 0.250 |
| <b>CVD mortality</b>                                    |          |                  |                  |       |
| No. of cases                                            | 158      | 156              | 134              |       |
| Multivariable-adjusted HR (95% CI)                      | 1 (Ref.) | 0.89 (0.71–1.11) | 0.90 (0.71–1.14) | 0.358 |
| <b>CHD mortality</b>                                    |          |                  |                  |       |
| No. of cases                                            | 94       | 88               | 74               |       |
| Multivariable-adjusted HR (95% CI)                      | 1 (Ref.) | 0.87 (0.64–1.16) | 0.88 (0.64–1.22) | 0.429 |
| <b>Cancer mortality</b>                                 |          |                  |                  |       |
| No. of cases                                            | 134      | 178              | 131              |       |
| Multivariable-adjusted HR (95% CI)                      | 1 (Ref.) | 1.16 (0.92–1.45) | 1.01 (0.78–1.29) | 0.950 |
| <b>Other-cause mortality</b>                            |          |                  |                  |       |
| No. of cases                                            | 123      | 129              | 109              |       |
| Multivariable-adjusted HR (95% CI)                      | 1 (Ref.) | 0.89 (0.69–1.14) | 0.86 (0.66–1.12) | 0.258 |
| <b>Excluding participants with death within 2 years</b> |          |                  |                  |       |
| No. of participants                                     | 3301     | 3884             | 3503             |       |
| <b>All-cause mortality</b>                              |          |                  |                  |       |
| No. of cases                                            | 377      | 418              | 342              |       |
| Multivariable-adjusted HR (95% CI)                      | 1 (Ref.) | 1.00 (0.87–1.14) | 0.93 (0.80–1.07) | 0.312 |
| <b>CVD mortality</b>                                    |          |                  |                  |       |
| No. of cases                                            | 139      | 136              | 113              |       |
| Multivariable-adjusted HR (95% CI)                      | 1 (Ref.) | 0.90 (0.72–1.13) | 0.89 (0.70–1.14) | 0.357 |

|                                    |          |                  |                  |       |
|------------------------------------|----------|------------------|------------------|-------|
| <b>CHD mortality</b>               |          |                  |                  |       |
| No. of cases                       | 81       | 78               | 64               |       |
| Multivariable-adjusted HR (95% CI) | 1 (Ref.) | 0.88 (0.65–1.19) | 0.90 (0.65–1.24) | 0.491 |
| <b>Cancer mortality</b>            |          |                  |                  |       |
| No. of cases                       | 122      | 163              | 122              |       |
| Multivariable-adjusted HR (95% CI) | 1 (Ref.) | 1.18 (0.94–1.48) | 1.03 (0.80–1.32) | 0.849 |
| <b>Other-cause mortality</b>       |          |                  |                  |       |
| No. of cases                       | 116      | 119              | 107              |       |
| Multivariable-adjusted HR (95% CI) | 1 (Ref.) | 0.91 (0.71–1.18) | 0.87 (0.66–1.14) | 0.311 |
| <b>Excluding the South Asian</b>   |          |                  |                  |       |
| No. of participants                | 3312     | 3872             | 3471             |       |
| <b>All-cause mortality</b>         |          |                  |                  |       |
| No. of cases                       | 414      | 468              | 373              |       |
| Multivariable-adjusted HR (95% CI) | 1 (Ref.) | 0.99 (0.87–1.14) | 0.92 (0.80–1.07) | 0.287 |
| <b>CVD mortality</b>               |          |                  |                  |       |
| No. of cases                       | 159      | 157              | 135              |       |
| Multivariable-adjusted HR (95% CI) | 1 (Ref.) | 0.89 (0.71–1.11) | 0.90 (0.71–1.14) | 0.373 |
| <b>CHD mortality</b>               |          |                  |                  |       |
| No. of cases                       | 94       | 89               | 74               |       |
| Multivariable-adjusted HR (95% CI) | 1 (Ref.) | 0.87 (0.65–1.17) | 0.88 (0.64–1.21) | 0.418 |
| <b>Cancer mortality</b>            |          |                  |                  |       |
| No. of cases                       | 134      | 181              | 132              |       |
| Multivariable-adjusted HR (95% CI) | 1 (Ref.) | 1.19 (0.95–1.49) | 1.02 (0.80–1.32) | 0.846 |

|                                                            |          |                  |                  |       |
|------------------------------------------------------------|----------|------------------|------------------|-------|
| <b>Other-cause mortality</b>                               |          |                  |                  |       |
| No. of cases                                               | 121      | 130              | 106              |       |
| Multivariable-adjusted HR (95% CI)                         | 1 (Ref.) | 0.92 (0.71–1.18) | 0.85 (0.65–1.12) | 0.254 |
| <b>Energy-adjusted hPDI</b>                                |          |                  |                  |       |
| No. of participants                                        | 3472     | 3947             | 3405             |       |
| <b>All-cause mortality</b>                                 |          |                  |                  |       |
| No. of cases                                               | 433      | 477              | 363              |       |
| Multivariable-adjusted HR (95% CI)                         | 1 (Ref.) | 1.01 (0.89–1.16) | 0.93 (0.80–1.08) | 0.350 |
| <b>CVD mortality</b>                                       |          |                  |                  |       |
| No. of cases                                               | 173      | 152              | 132              |       |
| Multivariable-adjusted HR (95% CI)                         | 1 (Ref.) | 0.84 (0.68–1.05) | 0.89 (0.70–1.13) | 0.298 |
| <b>CHD mortality</b>                                       |          |                  |                  |       |
| No. of cases                                               | 102      | 87               | 73               |       |
| Multivariable-adjusted HR (95% CI)                         | 1 (Ref.) | 0.88 (0.66–1.18) | 0.89 (0.65–1.22) | 0.449 |
| <b>Cancer mortality</b>                                    |          |                  |                  |       |
| No. of cases                                               | 140      | 185              | 127              |       |
| Multivariable-adjusted HR (95% CI)                         | 1 (Ref.) | 1.21 (0.97–1.51) | 1.01 (0.79–1.30) | 0.891 |
| <b>Other-cause mortality</b>                               |          |                  |                  |       |
| No. of cases                                               | 120      | 140              | 104              |       |
| Multivariable-adjusted HR (95% CI)                         | 1 (Ref.) | 1.04 (0.81–1.33) | 0.91 (0.69–1.19) | 0.497 |
| <b>Excluding participants with only one dietary recall</b> |          |                  |                  |       |
| No. of participants                                        | 2207     | 2261             | 1645             |       |
| <b>All-cause mortality</b>                                 |          |                  |                  |       |

|                                                     |          |                  |                  |              |
|-----------------------------------------------------|----------|------------------|------------------|--------------|
| No. of cases                                        | 260      | 235              | 145              |              |
| Multivariable-adjusted HR (95% CI)                  | 1 (Ref.) | 0.86 (0.71–1.04) | 0.83 (0.68–1.01) | 0.051        |
| <b>CVD mortality</b>                                |          |                  |                  |              |
| No. of cases                                        | 102      | 70               | 38               |              |
| Multivariable-adjusted HR (95% CI)                  | 1 (Ref.) | 0.63 (0.45–0.88) | 0.63 (0.44–0.89) | <b>0.005</b> |
| <b>CHD mortality</b>                                |          |                  |                  |              |
| No. of cases                                        | 63       | 33               | 21               |              |
| Multivariable-adjusted HR (95% CI)                  | 1 (Ref.) | 0.52 (0.33–0.82) | 0.56 (0.35–0.91) | <b>0.007</b> |
| <b>Cancer mortality</b>                             |          |                  |                  |              |
| No. of cases                                        | 81       | 99               | 67               |              |
| Multivariable-adjusted HR (95% CI)                  | 1 (Ref.) | 1.16 (0.85–1.59) | 1.25 (0.91–1.72) | 0.172        |
| <b>Other-cause mortality</b>                        |          |                  |                  |              |
| No. of cases                                        | 77       | 66               | 40               |              |
| Multivariable-adjusted HR (95% CI)                  | 1 (Ref.) | 0.87 (0.62–1.24) | 0.67 (0.46–0.97) | <b>0.037</b> |
| <b>Further adjusting for glucose-lowering drugs</b> |          |                  |                  |              |
| No. of participants                                 | 3343     | 3939             | 3542             |              |
| <b>All-cause mortality</b>                          |          |                  |                  |              |
| No. of cases                                        | 419      | 473              | 381              |              |
| Multivariable-adjusted HR (95% CI)                  | 1 (Ref.) | 0.98 (0.86–1.12) | 0.92 (0.80–1.06) | 0.265        |
| <b>CVD mortality</b>                                |          |                  |                  |              |
| No. of cases                                        | 161      | 159              | 137              |              |
| Multivariable-adjusted HR (95% CI)                  | 1 (Ref.) | 0.88 (0.70–1.10) | 0.89 (0.70–1.13) | 0.340        |
| <b>CHD mortality</b>                                |          |                  |                  |              |

|                                    |          |                  |                  |       |
|------------------------------------|----------|------------------|------------------|-------|
| No. of cases                       | 96       | 90               | 76               |       |
| Multivariable-adjusted HR (95% CI) | 1 (Ref.) | 0.86 (0.64–1.15) | 0.88 (0.64–1.21) | 0.407 |
| <b>Cancer mortality</b>            |          |                  |                  |       |
| No. of cases                       | 135      | 183              | 134              |       |
| Multivariable-adjusted HR (95% CI) | 1 (Ref.) | 1.19 (0.95–1.49) | 1.02 (0.79–1.30) | 0.891 |
| <b>Other-cause mortality</b>       |          |                  |                  |       |
| No. of cases                       | 123      | 131              | 110              |       |
| Multivariable-adjusted HR (95% CI) | 1 (Ref.) | 0.90 (0.70–1.15) | 0.86 (0.66–1.12) | 0.260 |

\*Glucose-lowering drugs including oral and insulin.

CI = confidence interval; HR = hazard ratio.

The multivariate model was adjusted for age, sex, race, centers, BMI, household income, Townsend deprivation index, total energy intake, smoking status, alcohol consumption, physical activity, history of hypertension, history of hypercholesterolemia, history of diabetes, family history of cardiovascular disease, vitamin supplement use, mineral supplement use, aspirin use, lipid-lowering drug use and CVD duration.

**Table S13.** Sensitivity Analyses for Multivariable Hazard Ratios (95% CIs) of Mortality According to uPDI.

|                                                                | Tertile of unhealthful plant-based diet index |                  |                  | P for trend      |
|----------------------------------------------------------------|-----------------------------------------------|------------------|------------------|------------------|
|                                                                | T1                                            | T2               | T3               |                  |
| <b>Excluding participants with extreme BMI</b>                 |                                               |                  |                  |                  |
| No. of participants                                            | 3364                                          | 3268             | 3780             |                  |
| <b>All-cause mortality</b>                                     |                                               |                  |                  |                  |
| No. of cases                                                   | 341                                           | 365              | 500              |                  |
| Multivariable-adjusted HR (95% CI)                             | 1 (Ref.)                                      | 1.14 (0.99–1.33) | 1.32 (1.15–1.52) | <b>&lt;0.001</b> |
| <b>CVD mortality</b>                                           |                                               |                  |                  |                  |
| No. of cases                                                   | 111                                           | 130              | 184              |                  |
| Multivariable-adjusted HR (95% CI)                             | 1 (Ref.)                                      | 1.27 (0.99–1.64) | 1.46 (1.14–1.86) | <b>0.003</b>     |
| <b>CHD mortality</b>                                           |                                               |                  |                  |                  |
| No. of cases                                                   | 57                                            | 74               | 113              |                  |
| Multivariable-adjusted HR (95% CI)                             | 1 (Ref.)                                      | 1.36 (0.96–1.92) | 1.68 (1.21–2.34) | <b>0.002</b>     |
| <b>Cancer mortality</b>                                        |                                               |                  |                  |                  |
| No. of cases                                                   | 118                                           | 152              | 169              |                  |
| Multivariable-adjusted HR (95% CI)                             | 1 (Ref.)                                      | 1.38 (1.08–1.75) | 1.32 (1.03–1.68) | <b>0.034</b>     |
| <b>Other-cause mortality</b>                                   |                                               |                  |                  |                  |
| No. of cases                                                   | 112                                           | 83               | 147              |                  |
| Multivariable-adjusted HR (95% CI)                             | 1 (Ref.)                                      | 0.78 (0.58–1.03) | 1.18 (0.92–1.53) | 0.157            |
| <b>Excluding participants with extreme total energy intake</b> |                                               |                  |                  |                  |
| No. of participants                                            | 3451                                          | 3361             | 3881             |                  |

|                                                         |          |                  |                  |                  |
|---------------------------------------------------------|----------|------------------|------------------|------------------|
| <b>All-cause mortality</b>                              |          |                  |                  |                  |
| No. of cases                                            | 354      | 383              | 515              |                  |
| Multivariable-adjusted HR (95% CI)                      | 1 (Ref.) | 1.15 (0.99–1.33) | 1.31 (1.14–1.51) | <b>&lt;0.001</b> |
| <b>CVD mortality</b>                                    |          |                  |                  |                  |
| No. of cases                                            | 117      | 137              | 194              |                  |
| Multivariable-adjusted HR (95% CI)                      | 1 (Ref.) | 1.25 (0.98–1.61) | 1.44 (1.14–1.83) | <b>0.003</b>     |
| <b>CHD mortality</b>                                    |          |                  |                  |                  |
| No. of cases                                            | 60       | 78               | 118              |                  |
| Multivariable-adjusted HR (95% CI)                      | 1 (Ref.) | 1.34 (0.96–1.88) | 1.66 (1.20–2.28) | <b>0.002</b>     |
| <b>Cancer mortality</b>                                 |          |                  |                  |                  |
| No. of cases                                            | 119      | 155              | 169              |                  |
| Multivariable-adjusted HR (95% CI)                      | 1 (Ref.) | 1.38 (1.09–1.76) | 1.30 (1.02–1.66) | <b>0.040</b>     |
| <b>Other-cause mortality</b>                            |          |                  |                  |                  |
| No. of cases                                            | 118      | 91               | 152              |                  |
| Multivariable-adjusted HR (95% CI)                      | 1 (Ref.) | 0.81 (0.61–1.06) | 1.19 (0.93–1.52) | 0.147            |
| <b>Excluding participants with death within 2 years</b> |          |                  |                  |                  |
| No. of participants                                     | 3464     | 3362             | 3862             |                  |
| <b>All-cause mortality</b>                              |          |                  |                  |                  |
| No. of cases                                            | 329      | 353              | 455              |                  |
| Multivariable-adjusted HR (95% CI)                      | 1 (Ref.) | 1.15 (0.99–1.33) | 1.29 (1.12–1.49) | <b>&lt;0.001</b> |
| <b>CVD mortality</b>                                    |          |                  |                  |                  |
| No. of cases                                            | 102      | 119              | 167              |                  |
| Multivariable-adjusted HR (95% CI)                      | 1 (Ref.) | 1.25 (0.97–1.60) | 1.41 (1.11–1.79) | <b>0.006</b>     |



|                                    |          |                  |                  |                  |
|------------------------------------|----------|------------------|------------------|------------------|
| <b>CHD mortality</b>               |          |                  |                  |                  |
| No. of cases                       | 53       | 69               | 101              |                  |
| Multivariable-adjusted HR (95% CI) | 1 (Ref.) | 1.31 (0.93–1.85) | 1.63 (1.17–2.25) | <b>0.003</b>     |
| <b>Cancer mortality</b>            |          |                  |                  |                  |
| No. of cases                       | 113      | 144              | 150              |                  |
| Multivariable-adjusted HR (95% CI) | 1 (Ref.) | 1.39 (1.09–1.76) | 1.27 (1.00–1.62) | 0.068            |
| <b>Other-cause mortality</b>       |          |                  |                  |                  |
| No. of cases                       | 114      | 90               | 138              |                  |
| Multivariable-adjusted HR (95% CI) | 1 (Ref.) | 0.82 (0.62–1.08) | 1.20 (0.93–1.54) | 0.133            |
| <b>Excluding the South Asian</b>   |          |                  |                  |                  |
| No. of participants                | 3454     | 3345             | 3856             |                  |
| <b>All-cause mortality</b>         |          |                  |                  |                  |
| No. of cases                       | 355      | 385              | 515              |                  |
| Multivariable-adjusted HR (95% CI) | 1 (Ref.) | 1.16 (1.01–1.35) | 1.33 (1.15–1.53) | <b>&lt;0.001</b> |
| <b>CVD mortality</b>               |          |                  |                  |                  |
| No. of cases                       | 119      | 137              | 195              |                  |
| Multivariable-adjusted HR (95% CI) | 1 (Ref.) | 1.25 (0.97–1.59) | 1.44 (1.13–1.82) | <b>0.003</b>     |
| <b>CHD mortality</b>               |          |                  |                  |                  |
| No. of cases                       | 61       | 78               | 118              |                  |
| Multivariable-adjusted HR (95% CI) | 1 (Ref.) | 1.34 (0.95–1.87) | 1.65 (1.20–2.28) | <b>0.002</b>     |
| <b>Cancer mortality</b>            |          |                  |                  |                  |
| No. of cases                       | 119      | 157              | 171              |                  |
| Multivariable-adjusted HR (95% CI) | 1 (Ref.) | 1.42 (1.11–1.80) | 1.34 (1.05–1.70) | <b>0.024</b>     |

|                                                            |          |                  |                  |              |
|------------------------------------------------------------|----------|------------------|------------------|--------------|
| <b>Other-cause mortality</b>                               |          |                  |                  |              |
| No. of cases                                               | 117      | 91               | 149              |              |
| Multivariable-adjusted HR (95% CI)                         | 1 (Ref.) | 0.83 (0.63–1.09) | 1.20 (0.93–1.54) | 0.138        |
| <b>Energy-adjusted uPDI</b>                                |          |                  |                  |              |
| No. of participants                                        | 3346     | 3953             | 3525             |              |
| <b>All-cause mortality</b>                                 |          |                  |                  |              |
| No. of cases                                               | 339      | 466              | 468              |              |
| Multivariable-adjusted HR (95% CI)                         | 1 (Ref.) | 1.16 (1.00–1.33) | 1.28 (1.10–1.47) | <b>0.001</b> |
| <b>CVD mortality</b>                                       |          |                  |                  |              |
| No. of cases                                               | 114      | 167              | 176              |              |
| Multivariable-adjusted HR (95% CI)                         | 1 (Ref.) | 1.23 (0.96–1.56) | 1.38 (1.08–1.76) | <b>0.010</b> |
| <b>CHD mortality</b>                                       |          |                  |                  |              |
| No. of cases                                               | 59       | 87               | 116              |              |
| Multivariable-adjusted HR (95% CI)                         | 1 (Ref.) | 1.19 (0.85–1.66) | 1.70 (1.23–2.35) | <b>0.001</b> |
| <b>Cancer mortality</b>                                    |          |                  |                  |              |
| No. of cases                                               | 119      | 178              | 155              |              |
| Multivariable-adjusted HR (95% CI)                         | 1 (Ref.) | 1.26 (0.99–1.59) | 1.22 (0.95–1.56) | 0.132        |
| <b>Other-cause mortality</b>                               |          |                  |                  |              |
| No. of cases                                               | 106      | 121              | 137              |              |
| Multivariable-adjusted HR (95% CI)                         | 1 (Ref.) | 0.97 (0.74–1.26) | 1.22 (0.94–1.58) | 0.127        |
| <b>Excluding participants with only one dietary recall</b> |          |                  |                  |              |
| No. of participants                                        | 2196     | 1977             | 1940             |              |
| <b>All-cause mortality</b>                                 |          |                  |                  |              |

|                                                     |          |                  |                  |                  |
|-----------------------------------------------------|----------|------------------|------------------|------------------|
| No. of cases                                        | 205      | 209              | 226              |                  |
| Multivariable-adjusted HR (95% CI)                  | 1 (Ref.) | 1.18 (0.97–1.43) | 1.31 (1.08–1.59) | <b>0.007</b>     |
| <b>CVD mortality</b>                                |          |                  |                  |                  |
| No. of cases                                        | 56       | 70               | 84               |                  |
| Multivariable-adjusted HR (95% CI)                  | 1 (Ref.) | 1.48 (1.04–2.10) | 1.71 (1.20–2.43) | <b>0.003</b>     |
| <b>CHD mortality</b>                                |          |                  |                  |                  |
| No. of cases                                        | 31       | 41               | 45               |                  |
| Multivariable-adjusted HR (95% CI)                  | 1 (Ref.) | 1.50 (0.94–2.41) | 1.63 (1.01–2.63) | <b>0.048</b>     |
| <b>Cancer mortality</b>                             |          |                  |                  |                  |
| No. of cases                                        | 78       | 93               | 76               |                  |
| Multivariable-adjusted HR (95% CI)                  | 1 (Ref.) | 1.34 (0.99–1.81) | 1.14 (0.82–1.58) | 0.402            |
| <b>Other-cause mortality</b>                        |          |                  |                  |                  |
| No. of cases                                        | 71       | 46               | 66               |                  |
| Multivariable-adjusted HR (95% CI)                  | 1 (Ref.) | 0.74 (0.51–1.08) | 1.17 (0.83–1.67) | 0.435            |
| <b>Further adjusting for glucose-lowering drugs</b> |          |                  |                  |                  |
| No. of participants                                 | 3493     | 3397             | 3934             |                  |
| <b>All-cause mortality</b>                          |          |                  |                  |                  |
| No. of cases                                        | 358      | 388              | 527              |                  |
| Multivariable-adjusted HR (95% CI)                  | 1 (Ref.) | 1.15 (1.00–1.33) | 1.33 (1.16–1.53) | <b>&lt;0.001</b> |
| <b>CVD mortality</b>                                |          |                  |                  |                  |
| No. of cases                                        | 120      | 138              | 199              |                  |
| Multivariable-adjusted HR (95% CI)                  | 1 (Ref.) | 1.23 (0.97–1.58) | 1.44 (1.14–1.82) | <b>0.002</b>     |
| <b>CHD mortality</b>                                |          |                  |                  |                  |

|                                    |          |                  |                  |              |
|------------------------------------|----------|------------------|------------------|--------------|
| No. of cases                       | 62       | 79               | 121              |              |
| Multivariable-adjusted HR (95% CI) | 1 (Ref.) | 1.31 (0.94–1.84) | 1.64 (1.19–2.25) | <b>0.002</b> |
| <b>Cancer mortality</b>            |          |                  |                  |              |
| No. of cases                       | 120      | 158              | 174              |              |
| Multivariable-adjusted HR (95% CI) | 1 (Ref.) | 1.40 (1.10–1.78) | 1.34 (1.05–1.70) | <b>0.023</b> |
| <b>Other-cause mortality</b>       |          |                  |                  |              |
| No. of cases                       | 118      | 92               | 154              |              |
| Multivariable-adjusted HR (95% CI) | 1 (Ref.) | 0.82 (0.62–1.08) | 1.21 (0.94–1.55) | 0.115        |

\*Glucose-lowering drugs including oral and insulin.

CI = confidence interval; HR = hazard ratio.

The multivariate model was adjusted for age, sex, race, centers, BMI, household income, Townsend deprivation index, total energy intake, smoking status, alcohol consumption, physical activity, history of hypertension, history of hypercholesterolemia, history of diabetes, family history of cardiovascular disease, vitamin supplement use, mineral supplement use, aspirin use, lipid-lowering drug use and CVD duration.

**Table S14.** Sensitivity Analyses for Hazard Ratios (95% CIs) of All-Cause Mortality and Cause-Specific Mortality According to Tertiles of PDI, hPDI, or uPDI based on food intake in “g/d” rather than “serving/d” among Patients with CVD.

|                              | Tertiles of PDI |                  |                  | P for trend      |
|------------------------------|-----------------|------------------|------------------|------------------|
|                              | T1              | T2               | T3               |                  |
| <b>PDI</b>                   |                 |                  |                  |                  |
| No. of participants          | 3330            | 3745             | 3748             |                  |
| <b>All-cause mortality</b>   |                 |                  |                  |                  |
| No. of cases                 | 428             | 444              | 401              |                  |
| Model 1                      | 1 (Ref.)        | 0.87 (0.77–1.00) | 0.76 (0.66–0.87) | <b>&lt;0.001</b> |
| Model 2                      | 1 (Ref.)        | 0.94 (0.82–1.08) | 0.84 (0.73–0.97) | <b>0.016</b>     |
| Model 3                      | 1 (Ref.)        | 0.95 (0.83–1.08) | 0.84 (0.73–0.97) | <b>0.018</b>     |
| <b>CVD mortality</b>         |                 |                  |                  |                  |
| No. of cases                 | 150             | 160              | 147              |                  |
| Model 1                      | 1 (Ref.)        | 0.92 (0.73–1.14) | 0.80 (0.63–1.00) | 0.051            |
| Model 2                      | 1 (Ref.)        | 0.95 (0.83–1.08) | 0.84 (0.73–0.97) | 0.328            |
| Model 3                      | 1 (Ref.)        | 0.99 (0.79–1.24) | 0.91 (0.72–1.15) | 0.436            |
| <b>CHD mortality</b>         |                 |                  |                  |                  |
| No. of cases                 | 81              | 90               | 91               |                  |
| Model 1                      | 1 (Ref.)        | 0.97 (0.72–1.31) | 0.95 (0.70–1.28) | 0.726            |
| Model 2                      | 1 (Ref.)        | 1.07 (0.79–1.45) | 1.08 (0.79–1.46) | 0.652            |
| Model 3                      | 1 (Ref.)        | 1.09 (0.80–1.48) | 1.13 (0.83–1.53) | 0.458            |
| <b>Cancer mortality</b>      |                 |                  |                  |                  |
| No. of cases                 | 150             | 161              | 141              |                  |
| Model 1                      | 1 (Ref.)        | 0.89 (0.72–1.12) | 0.75 (0.59–0.94) | <b>0.013</b>     |
| Model 2                      | 1 (Ref.)        | 0.97 (0.78–1.22) | 0.87 (0.69–1.10) | 0.247            |
| Model 3                      | 1 (Ref.)        | 0.97 (0.78–1.22) | 0.87 (0.69–1.10) | 0.249            |
| <b>Other-cause mortality</b> |                 |                  |                  |                  |
| No. of cases                 | 128             | 123              | 113              |                  |
| Model 1                      | 1 (Ref.)        | 0.81 (0.63–1.03) | 0.72 (0.56–0.93) | <b>0.011</b>     |
| Model 2                      | 1 (Ref.)        | 0.87 (0.68–1.12) | 0.76 (0.59–0.99) | <b>0.042</b>     |
| Model 3                      | 1 (Ref.)        | 0.87 (0.67–1.11) | 0.75 (0.58–0.97) | <b>0.029</b>     |
| <b>hPDI</b>                  |                 |                  |                  |                  |
| No. of participants          | 3787            | 3351             | 3685             |                  |
| <b>All-cause mortality</b>   |                 |                  |                  |                  |
| No. of cases                 | 475             | 403              | 395              |                  |
| Model 1                      | 1 (Ref.)        | 0.91 (0.80–1.04) | 0.81 (0.71–0.92) | <b>0.002</b>     |
| Model 2                      | 1 (Ref.)        | 0.97 (0.85–1.11) | 0.90 (0.79–1.04) | 0.144            |
| Model 3                      | 1 (Ref.)        | 0.97 (0.85–1.11) | 0.91 (0.79–1.04) | 0.163            |
| <b>CVD mortality</b>         |                 |                  |                  |                  |

|                              |          |                  |                  |                  |
|------------------------------|----------|------------------|------------------|------------------|
| No. of cases                 | 176      | 127              | 154              |                  |
| Model 1                      | 1 (Ref.) | 0.78 (0.62–0.98) | 0.86 (0.69–1.07) | 0.167            |
| Model 2                      | 1 (Ref.) | 0.83 (0.66–1.05) | 0.98 (0.78–1.22) | 0.778            |
| Model 3                      | 1 (Ref.) | 0.84 (0.67–1.06) | 1.01 (0.80–1.26) | 0.993            |
| <b>CHD mortality</b>         |          |                  |                  |                  |
| No. of cases                 | 97       | 72               | 93               |                  |
| Model 1                      | 1 (Ref.) | 0.82 (0.61–1.11) | 0.98 (0.73–1.30) | 0.861            |
| Model 2                      | 1 (Ref.) | 0.87 (0.64–1.18) | 1.11 (0.82–1.49) | 0.519            |
| Model 3                      | 1 (Ref.) | 0.89 (0.65–1.21) | 1.18 (0.88–1.60) | 0.288            |
| <b>Cancer mortality</b>      |          |                  |                  |                  |
| No. of cases                 | 163      | 155              | 134              |                  |
| Model 1                      | 1 (Ref.) | 1.02 (0.82–1.27) | 0.79 (0.63–0.99) | <b>0.046</b>     |
| Model 2                      | 1 (Ref.) | 1.07 (0.86–1.34) | 0.90 (0.71–1.14) | 0.409            |
| Model 3                      | 1 (Ref.) | 1.07 (0.86–1.34) | 0.90 (0.71–1.14) | 0.403            |
| <b>Other-cause mortality</b> |          |                  |                  |                  |
| No. of cases                 | 136      | 121              | 107              |                  |
| Model 1                      | 1 (Ref.) | 0.95 (0.75–1.22) | 0.77 (0.60–0.99) | <b>0.041</b>     |
| Model 2                      | 1 (Ref.) | 1.03 (0.81–1.32) | 0.82 (0.63–1.07) | 0.147            |
| Model 3                      | 1 (Ref.) | 1.03 (0.80–1.32) | 0.80 (0.62–1.04) | 0.111            |
| <b>uPDI</b>                  |          |                  |                  |                  |
| No. of participants          | 3865     | 3381             | 3577             |                  |
| <b>All-cause mortality</b>   |          |                  |                  |                  |
| No. of cases                 | 401      | 388              | 484              |                  |
| Model 1                      | 1 (Ref.) | 1.12 (0.97–1.29) | 1.38 (1.21–1.58) | <b>&lt;0.001</b> |
| Model 2                      | 1 (Ref.) | 1.13 (0.98–1.30) | 1.29 (1.12–1.48) | <b>&lt;0.001</b> |
| Model 3                      | 1 (Ref.) | 1.13 (0.98–1.30) | 1.28 (1.12–1.47) | <b>&lt;0.001</b> |
| <b>CVD mortality</b>         |          |                  |                  |                  |
| No. of cases                 | 142      | 139              | 176              |                  |
| Model 1                      | 1 (Ref.) | 1.13 (0.90–1.43) | 1.40 (1.12–1.75) | <b>0.003</b>     |
| Model 2                      | 1 (Ref.) | 1.17 (0.92–1.48) | 1.31 (1.04–1.64) | <b>0.021</b>     |
| Model 3                      | 1 (Ref.) | 1.15 (0.91–1.46) | 1.28 (1.02–1.61) | <b>0.032</b>     |
| <b>CHD mortality</b>         |          |                  |                  |                  |
| No. of cases                 | 73       | 82               | 107              |                  |
| Model 1                      | 1 (Ref.) | 1.27 (0.93–1.74) | 1.57 (1.16–2.12) | <b>0.003</b>     |
| Model 2                      | 1 (Ref.) | 1.32 (0.96–1.81) | 1.54 (1.13–2.09) | <b>0.006</b>     |
| Model 3                      | 1 (Ref.) | 1.28 (0.93–1.77) | 1.49 (1.10–2.02) | <b>0.011</b>     |
| <b>Cancer mortality</b>      |          |                  |                  |                  |
| No. of cases                 | 147      | 137              | 168              |                  |
| Model 1                      | 1 (Ref.) | 1.08 (0.85–1.36) | 1.33 (1.07–1.67) | <b>0.011</b>     |
| Model 2                      | 1 (Ref.) | 1.06 (0.84–1.35) | 1.22 (0.97–1.53) | 0.085            |
| Model 3                      | 1 (Ref.) | 1.06 (0.84–1.35) | 1.22 (0.97–1.54) | 0.084            |

**Other-cause mortality**

|              |          |                  |                  |              |
|--------------|----------|------------------|------------------|--------------|
| No. of cases | 112      | 112              | 140              |              |
| Model 1      | 1 (Ref.) | 1.15 (0.89–1.50) | 1.41 (1.10–1.81) | <b>0.007</b> |
| Model 2      | 1 (Ref.) | 1.18 (0.90–1.53) | 1.35 (1.04–1.74) | <b>0.022</b> |
| Model 3      | 1 (Ref.) | 1.18 (0.91–1.54) | 1.36 (1.05–1.75) | <b>0.020</b> |

Model 1: adjusted for age (continues) and sex (male, female).

Model 2: Model 1 + further adjusted race (white or non-white), assessment centers (22 categories), household income (<£18,000, £18,000-£30,999, £31,000-£51,999, £52,000-£100,000, >£100,000, or missing), total energy intake (tertile), TDI (tertile), smoking status (never, previous, or current), alcohol consumption (never or special occasions only, 1 or 2 times/week, 3 or 4 times/week, ≥5 times/week, or missing), physical activity (tertile), history of hypertension (yes or no), history of hypercholesterolemia (yes or no), history of diabetes (yes or no), family history of CVD (yes or no), vitamin supplement use (yes or no), mineral supplement use (yes or no), aspirin use (yes or no), lipid-lowering drug use (yes or no) and CVD duration (years; <5, 5 to 10, ≥10, or missing).

Model 3: Model 2 + further adjusted for BMI (in kg/m<sup>2</sup>; <18.5, 18.5 to 25, 25 to 30, 30 to 35 ≥35, or missing).
